1 **Genome wide identification of NAC transcription factors and their role in abiotic**  
2 **stress tolerance in *Chenopodium quinoa***

3 Nouf Owdah Alshareef<sup>1</sup>, Elodie Rey<sup>1</sup>, Holly Khoury<sup>1</sup>, Mark Tester<sup>1</sup>, Sandra M.  
4 Schmöckel<sup>1,2,\*</sup>

5  
6 <sup>1</sup> Division of Biological and Environmental Sciences and Engineering (BESE), King  
7 Abdullah University of Science & Technology (KAUST), Thuwal, Saudi Arabia

8 <sup>2</sup> Institute of Crop Science, Faculty of Agriculture, University of Hohenheim, Stuttgart,  
9 Germany

10

11 \* Corresponding author

12 Sandra.schmoeckel@uni-hohenheim.de

13

14 **Short Title:** NAC transcription factors in quinoa

15

16

17 **Author Contributions**

18 **Nouf Owdah Alshareef**

19 Roles: Conceptualization, Data Curation, Formal Analysis, Investigation, Validation,  
20 Visualization, Writing – Original Draft Preparation, Writing – review & editing

21 **Elodie Rey**

22 Formal Analysis, Validation

23 **Holly Khoury**

24 Investigation

25 **Mark Tester**

26 Conceptualization, Resources Supervision, Writing – Review & Editing, Funding acquisition

27 **Sandra M. Schmöckel**

28 Conceptualization, Resources, Supervision, Investigation, Formal Analysis, Validation, Writing –  
29 original draft, Writing – Review & Editing

## 30 **Abstract**

31 *Chenopodium quinoa* Willd. (quinoa) is a pseudocereal with high nutritional value and  
32 relatively high tolerance to several abiotic stresses, including water deficiency and  
33 salt stress, making it a suitable plant for the study of mechanisms of abiotic stress  
34 tolerance. NAC (NAM, ATAF and CUC) transcription factors are involved in a  
35 range of plant developmental processes and in the response of plants to biotic and  
36 abiotic stresses. In the present study, we perform a genome-wide comprehensive  
37 analysis of the *NAC* transcription factor gene family in quinoa. In total, we identified  
38 107 quinoa *NAC* transcription factor genes, distributed equally between sub-  
39 genomes A and B. They are phylogenetically clustered into two major groups and  
40 18 subgroups. Almost 75% of the identified *CqNAC* genes were duplicated two to  
41 seven times and the remaining 25% of the *CqNAC* genes were found as a single  
42 copy. We analysed the transcriptional responses of the identified quinoa *NAC* TF  
43 genes in response to various abiotic stresses. The transcriptomic data revealed 28  
44 stress responsive *CqNAC* genes, where their expression significantly changed in  
45 response to one or more abiotic stresses, including salt, water deficiency, heat and  
46 phosphate starvation. Among these stress responsive NACs, some were  
47 previously known to be stress responsive in other species, indicating their  
48 potentially conserved function in response to abiotic stress across plant species.  
49 Six genes were differentially expressed specifically in response to phosphate  
50 starvation but not to other stresses, and these genes may play a role in controlling  
51 plant responses to phosphate deficiency. These results provide insights into

52 quinoa NACs that could be used in the future for genetic engineering or molecular  
53 breeding.

## 54 **1. Introduction**

55 The NAC transcription factor (TF) family is plant specific and is one of the largest families  
56 of TFs in plants. The acronym for NAC is derived from three TFs: NAM, ATAF and CUC,  
57 where NAM is an acronym for No Apical Meristem (1), ATAF stands for Arabidopsis  
58 Transcription Activator Factor (2), and CUC is a Cup Shaped Cotyledon (1). These three  
59 genes share a conserved N-terminal DNA-binding NAC domain. *Arabidopsis thaliana*  
60 (Arabidopsis) has 117 NACs, also called ANACs (3), rice has 151 NACs called ONACs  
61 (3), and soybean has 152 NACs (4). NAC proteins regulate a wide range of physiological  
62 and developmental processes – for example, petunia NAM and Arabidopsis CUC1-2  
63 proteins are involved in shoot meristem development (1, 2). Other NAC members are  
64 involved in floral morphology (1, 5), plant senescence (6, 7), cell division (8), cell wall  
65 synthesis (9) and lateral root development (10).

66 Typical NAC TF proteins are characterized by a highly conserved DNA binding NAC  
67 domain at the N-terminus region. The NAC domain spans approximately 150 amino acids  
68 and consists of five conserved subdomains (A-E) that make up motifs for DNA binding,  
69 protein-protein interaction or transcription factor dimerization (11). Subdomains C and D  
70 are conserved and bind to DNA, subdomain A is involved in NAC dimerization, and  
71 subdomains B and E are highly divergent and may contribute to the functional diversity  
72 of NAC TFs (11, 12). The C-terminal region of NAC TFs is diversified and contains the

73 transcription regulatory domain, which contributes to either transcription activation or  
74 repression (11, 13, 14).

75 Some NAC TF proteins possess transmembrane motifs in the C-terminal region that  
76 anchor NAC proteins to the intracellular membranes and make it inactive (15). When the  
77 NAC protein is activated, it undergoes proteolytic cleavage to release the NAC protein  
78 from the membrane to enable its TF function in the nucleus. These membrane-associated  
79 NAC TFs are designated as NAC with transmembrane motif1-like (NTL); most of them  
80 are associated with plasma membranes and a few are anchored to the endoplasmic  
81 reticulum membrane (15). The size of these NTL TFs is larger (from 335-652 amino acids)  
82 than the non-membrane associated NAC TFs, which are usually around 320 residues  
83 (15). More than 13 NAC TFs in Arabidopsis and six in rice have been described as NTL  
84 (15).

85 Some variation in the structure of NAC proteins has been reported. These NACs are  
86 called atypical NAC proteins or NAC-like proteins. These variant proteins include some  
87 proteins that have only a NAC domain without a C-terminal region (16, 17) and other  
88 proteins that have a tandem repeat of the NAC domains (12). Another two variants of  
89 NAC proteins are: suppressor of gamma response 1 (SOG1) proteins that have an extra  
90 sequence preceding the conserved NAC domain (17, 18), and vascular plant one-zinc-  
91 finger (VOZ) proteins that have a DNA-binding zinc finger, transcriptional regulation  
92 domain (TRD) at the N-terminal and a NAC domain at the C-terminus (12-14, 19).

93 Quinoa (*Chenopodium quinoa Willd.*,  $2n=4x=36$ ) is a dicotyledonous allotetraploid  
94 pseudocereal plant with 18 chromosomes (20). It belongs to the Amaranthaceae family,  
95 which also includes other economically important crops such as *Beta*

96 *vulgaris* (beet), *Spinacia oleracea* (spinach) and *Amaranthus hypochondriacus*  
97 (amaranth). Quinoa has recently gained much attention due to its high nutritional value  
98 and high tolerance to environmental stresses. The grain of quinoa has a balanced ratio  
99 of carbohydrates, lipids and protein, a higher content of essential amino acids and is rich  
100 in iron and vitamins such as vitamin B1, B6 and E (21). In addition to quinoa's nutritional  
101 value, it has a high tolerance to different abiotic stresses, including low temperature,  
102 drought and salinity (22, 23). Quinoa maintains the highest biomass when grown at 100  
103 mM NaCl and the biomass is reduced by up to 50% when it grows under 500 mM NaCl  
104 (24). These traits make quinoa a good model for understanding the mechanisms of stress  
105 tolerance.

106 The recent completion of the genome of quinoa has allowed to study NAC genes at the  
107 whole genome level. To date, only the HSP17 and WRKY gene families have been  
108 systematically analysed in quinoa (25, 26). Here, we identify 107 NAC TF genes in the  
109 quinoa genome and investigate their transcriptional responses to different stresses  
110 including salt, drought and heat. We perform a systematic analysis of NAC TFs in quinoa  
111 using the available high-quality reference genome sequence of quinoa (27). This study  
112 provides a basis for future functional characterization of NAC TFs in quinoa that could be  
113 used in quinoa stress-tolerance research.

114

115

116

## 117 **2. Results and discussion**

### 118 **2.1 Identification of the CqNAC transcription factors family in quinoa**

119 In order to identify NAC TFs in the genome of quinoa, we used a combination of several  
120 search methods that have been used previously to identify NACs in different plant  
121 species. We employed especially those methods that identified NACs in species with  
122 duplicated genomes, such as *Panicum virgatum* (Switchgrass), *Populus trichocarpa*  
123 (black cottonwood) and *Gossypium raimondii* (cotton) (28-31).

124 We used the reference genome of quinoa accession QQ74 (27) to identify NAC TFs in  
125 quinoa. First, we used the Hidden Markov Model (HMM) profile of the protein family  
126 (Pfam) “NAC domain” (PF02365) as a query to search for proteins containing NAC  
127 domains in the genome of quinoa using the phytozome database version12 (phytozome,  
128 <http://www.phytozome.net>, version 12). This search identified 104 putative NACs  
129 proteins. Then, we employed a basic local alignment tool for proteins (BLASTp) against  
130 QQ74 peptides using the NAC domain sequences of the 110 Arabidopsis NACs. This  
131 search identified 109 putative NACs (six more than the Pfam search using the phytozome  
132 database). To find further NACs in the genome of quinoa, we used the TF prediction tool  
133 from the Plant Transcription Factor Database (PTFDB, <http://plantfdb.cbi.pku.edu.cn/>,  
134 version 4.0) (32) to predict all TFs in the peptide sequences of quinoa as an input (44,776  
135 peptide sequences). We were able to identify 2093 TFs belonging to different families (S1  
136 Table); among those, 107 CqTFs belong to the NAC family. As a quality control and to  
137 verify the reliability of our search, we ran the same search method for Arabidopsis and  
138 verified that we received the expected number of Arabidopsis NACs.

139 In order to identify the total number of NAC TFs in quinoa, we generated a combined list  
140 of the three search approaches (Pfam, BLASTp and PTFDB) (Fig 1, S2 Table). This list  
141 consisted of 112 putative CqNACs. All of the three search methods resulted in a similar  
142 number of CqNACs (Fig 1). There were 103 CqNACs common to all of the search  
143 methods, with two CqNACs identified only in the PTFDB search and five CqNACs  
144 identified in the BLASTp search only. To further confirm these putative CqNAC genes,  
145 we scanned the protein sequence of all 112 putative CqNAC proteins for the presence of  
146 the NAC domain using the InterProScan program ([http://www.ebi.ac.uk/Tools/  
147 InterProScan/](http://www.ebi.ac.uk/Tools/InterProScan/)), the hmmscan function of the HMMER web server  
148 (<https://www.ebi.ac.uk/Tools/hmmer/search/hmmscan>, HmmerWeb version 2.28.0) (33)  
149 and conserved domain search (CDS) of the NCBI database. The presence of the NAC  
150 domain was confirmed in 107 CqNACs sequences, whereas the NAC domain was not  
151 present in the remaining five putative CqNAC proteins (all had been identified from the  
152 BLASTp search) (Fig 1, S2 Table). All of these search methods suggest that only 107  
153 CqNACs genes exist in the reference genome of quinoa. The confirmed 107 putative  
154 quinoa NACs are listed in Table 1 and are used for further analyses.

155

156 **Fig 1. Scheme representing the bioinformatic approaches used to identify NAC**  
157 **genes in the genome of quinoa.**

158 A combined list of three search approaches was generated (using Pfam, BLASTp and the  
159 TF prediction tool of the Plant Transcription Factor Database (PTFDB)). Scanned of all  
160 112 putative CqNAC proteins for the presence of the NAC domain using, the hmmscan  
161 function of the HMMER web server and conserved domain search (CDS) of the NCBI  
162 database. A total of 107 CqNAC proteins were identified.

163

164

165

166



167 **Table 1. NAC transcription factor family in quinoa.**  
 168 Illustrating the sub-genome location, start and end of each gene, gene length, number of  
 169 exons and protein length. CqNACs in bold with (\*) sign are membrane associated CqNAC  
 170 predicted by TMHMM server v.2.0. (<http://www.cbs.dtu.dk/services/TMHMM/>).  
 171

| Nb. | Gene ID            | Gene Name      | Brief Description                                 | chromosomal location_subgenome | START            | END              | gene length (bp) | Nb. exons | protein size (aa) |
|-----|--------------------|----------------|---------------------------------------------------|--------------------------------|------------------|------------------|------------------|-----------|-------------------|
| 1   | AUR62017896        | CqNAC02        | NAC002:NACdomain-containingprotein2 (ATAF-1)      | cq15_A                         | 20376810         | 20378712         | 1903             | 3         | 224               |
| 2   | AUR62003583        | CqNAC02        | NAC002:NACdomain-containingprotein2 (ATAF-1)      | cq9_B                          | 3900006          | 3901944          | 1939             | 3         | 224               |
| 3   | AUR62000536        | CqNAC02        | NAC002:NACdomain-containingprotein2 (ATAF-1)      | cq12_A                         | 6131839          | 6134224          | 2386             | 4         | 248               |
| 4   | AUR62015520        | CqNAC07        | NAC007: NAC domain-containing protein 7           | cq11_B                         | 21032546         | 21034478         | 1933             | 4         | 248               |
| 5   | AUR62002191        | CqNAC07        | NAC007: NAC domain-containing protein 7           | cq7_A                          | 65990389         | 65992323         | 1935             | 4         | 249               |
| 6   | AUR62007469        | CqNAC07        | NAC007: NAC domain-containing protein 7           | cq13_A                         | 728734           | 730378           | 1645             | 3         | 370               |
| 7   | AUR62039927        | CqNAC07        | NAC007: NAC domain-containing protein 7           | cq16_B                         | 78627158         | 78632662         | 5505             | 4         | 370               |
| 8   | AUR62004572        | CqNAC08        | NAC008: NAC domain-containing protein 8           | cq1_B                          | 120553744        | 120556805        | 3062             | 6         | 388               |
| 9   | AUR62022685        | CqNAC08        | NAC008: NAC domain-containing protein 8           | cq10_A                         | 5677119          | 5680213          | 3095             | 6         | 374               |
| 10  | AUR62002922        | CqNAC08        | NAC008: NAC domain-containing protein 8           | cq6_B                          | 15831647         | 15834922         | 3276             | 7         | 339               |
| 11  | AUR62035283        | CqNAC08        | NAC008: NAC domain-containing protein 8           | cq14_A                         | 9028304          | 9032559          | 4256             | 7         | 365               |
| 12  | AUR62029330        | CqNAC10        | NAC010: NAC domain-containing protein 10          | cq12_A                         | 51513524         | 51515901         | 2378             | 5         | 328               |
| 13  | AUR62031305        | CqONAC010      | ONAC010: NAC transcription factor ONAC010         | cq1_B                          | 25489514         | 25491226         | 1713             | 2         | 158               |
| 14  | AUR62027390        | CqONAC010      | ONAC010: NAC transcription factor ONAC010         | cq2_A                          | 40025813         | 40027566         | 1754             | 2         | 168               |
| 15  | AUR62016213        | CqONAC010      | ONAC010: NAC transcription factor ONAC010         | cq7_A                          | 75752855         | 75754429         | 1575             | 3         | 389               |
| 16  | AUR62011638        | CqONAC010      | ONAC010: NAC transcription factor ONAC010         | cq15_A                         | 13499168         | 13500708         | 1541             | 3         | 414               |
| 17  | <b>AUR62033952</b> | <b>CqNAC17</b> | <b>NAC017: NAC domain-containing protein 17 *</b> | <b>cq0_</b>                    | <b>184747668</b> | <b>184752783</b> | <b>5116</b>      | <b>5</b>  | <b>530</b>        |
| 18  | <b>AUR62029057</b> | <b>CqNAC17</b> | <b>NAC017: NAC domain-containing protein 17 *</b> | <b>cq2_A</b>                   | <b>37120934</b>  | <b>37126563</b>  | <b>5630</b>      | <b>4</b>  | <b>524</b>        |
| 19  | AUR62035514        | CqNAC21        | NAC021: NAC domain-containing protein 21/22       | cq5_B                          | 51399005         | 51402623         | 3619             | 2         | 153               |
| 20  | AUR62043497        | CqNAC21        | NAC021: NAC domain-containing protein 21/22       | cq12_A                         | 29606703         | 29610871         | 4169             | 2         | 155               |
| 21  | AUR62011853        | CqNAC21        | NAC021: NAC domain-containing protein 21/22       | cq8_A                          | 1858490          | 1862276          | 3787             | 2         | 145               |
| 22  | AUR62024698        | CqNAC21        | NAC021: NAC domain-containing protein 21/22       | cq9_B                          | 11061255         | 11065302         | 4048             | 3         | 149               |
| 23  | AUR62001365        | CqNAC25        | NAC025: NAC transcription factor 25               | cq7_A                          | 99573268         | 99576243         | 2976             | 3         | 307               |
| 24  | AUR62014768        | CqNAC25        | NAC025: NAC transcription factor 25               | cq1_B                          | 30397116         | 30398602         | 1487             | 3         | 343               |
| 25  | AUR62016954        | CqNAC25        | NAC025: NAC transcription factor 25               | cq2_A                          | 20121444         | 20123003         | 1560             | 3         | 327               |
| 26  | AUR62005821        | CqNAC29        | NAC029: NAC transcription factor 29               | cq14_A                         | 57750521         | 57756348         | 5828             | 5         | 288               |
| 27  | AUR62032816        | CqNAC29        | NAC029: NAC transcription factor 29               | cq6_B                          | 5793401          | 5794833          | 1433             | 3         | 272               |
| 28  | AUR62022690        | CqNAC30        | NAC030: NAC domain-containing protein 30          | cq10_A                         | 5723986          | 5732908          | 8923             | 5         | 571               |
| 29  | AUR62004648        | CqNAC30        | NAC030: NAC domain-containing protein 30          | cq1_B                          | 121459828        | 121461574        | 1747             | 3         | 334               |
| 30  | AUR62024101        | CqNAC31        | NAC031: Protein CUP-SHAPED COTYLEDON 3            | cq10_A                         | 59698378         | 59699514         | 1137             | 4         | 248               |
| 31  | AUR62035165        | CqNAC31        | NAC031: Protein CUP-SHAPED COTYLEDON 3            | cq3_B                          | 1657868          | 1658173          | 306              | 1         | 101               |
| 32  | AUR62043713        | CqNAC37        | NAC037: NAC domain-containing protein 37          | cq0_                           | 14884377         | 14886152         | 1776             | 3         | 265               |
| 33  | AUR62043235        | CqNAC37        | NAC037: NAC domain-containing protein 37          | cq9_B                          | 41526            | 43301            | 1776             | 3         | 265               |
| 34  | AUR62034813        | CqNAC41        | NAC041: NAC domain-containing protein 41          | cq16_B                         | 11304423         | 11306000         | 1578             | 3         | 228               |
| 35  | AUR62029543        | CqNAC41        | NAC041: NAC domain-containing protein 41          | cq8_A                          | 26693056         | 26699989         | 6934             | 5         | 365               |

|    |                    |                |                                                   |               |                  |                  |             |          |            |
|----|--------------------|----------------|---------------------------------------------------|---------------|------------------|------------------|-------------|----------|------------|
| 36 | AUR62026904        | CqNAC42        | NAC042: NAC domain-containing protein 42          | cq4_A         | 44976454         | 44984863         | 8410        | 3        | 344        |
| 37 | AUR62040889        | CqNAC42        | NAC042: NAC domain-containing protein 42          | cq1_B         | 72702858         | 72708102         | 5245        | 3        | 213        |
| 38 | AUR62004554        | CqNAC43        | NAC043: NAC domain-containing protein 43          | cq1_B         | 120299216        | 120301237        | 2022        | 3        | 334        |
| 39 | AUR62019936        | CqNAC43        | NAC043: NAC domain-containing protein 43          | cq16_B        | 72986058         | 72987726         | 1669        | 3        | 341        |
| 40 | AUR62022669        | CqNAC43        | NAC043: NAC domain-containing protein 43          | cq10_A        | 5477634          | 5479368          | 1735        | 3        | 250        |
| 41 | AUR62000492        | CqNAC45        | NAC045: NAC domain-containing protein 45          | cq12_A        | 5500539          | 5501585          | 1047        | 2        | 327        |
| 42 | AUR62004778        | CqNAC45        | NAC045: NAC domain-containing protein 45          | cq12_A        | 25145721         | 25148970         | 4056        | 6        | 576        |
| 43 | AUR62003400        | CqNAC45        | NAC045: NAC domain-containing protein 45          | cq9_B         | 1759783          | 1763912          | 4130        | 6        | 573        |
| 44 | AUR62037478        | CqNAC45        | NAC045: NAC domain-containing protein 45          | cq5_B         | 62910115         | 62914170         | 3250        | 3        | 241        |
| 45 | AUR62015629        | CqNAC56        | NAC056: NAC transcription factor 56               | cq5_B         | 3821692          | 3822921          | 1230        | 3        | 302        |
| 46 | AUR62029331        | CqNAC56        | NAC056: NAC transcription factor 56               | cq12_A        | 51490439         | 51492813         | 2375        | 4        | 327        |
| 47 | <b>AUR62001531</b> | <b>CqNAC60</b> | <b>NAC60: NAC domain-containing protein 60 *</b>  | <b>cq7_A</b>  | <b>101732643</b> | <b>101734168</b> | <b>1526</b> | <b>3</b> | <b>330</b> |
| 48 | AUR62007071        | CqNAC66        | NAC066: NAC domain-containing protein 66          | cq13_A        | 5441599          | 5443027          | 1429        | 3        | 279        |
| 49 | AUR62016200        | CqNAC67        | NAC67: NAC domain-containing protein 67           | cq7_A         | 75912843         | 75914874         | 2032        | 3        | 257        |
| 50 | AUR62036626        | CqNAC68        | NAC68: NAC domain-containing protein 68           | cq3_B         | 56560424         | 56570523         | 10100       | 4        | 279        |
| 51 | AUR62025580        | CqNAC68        | NAC68: NAC domain-containing protein 68           | cq18_B        | 24671246         | 24673006         | 1761        | 3        | 342        |
| 52 | AUR62025636        | CqNAC68        | NAC68: NAC domain-containing protein 68           | cq18_B        | 23977517         | 23979442         | 1926        | 3        | 354        |
| 53 | AUR62015630        | CqNAC72        | NAC072: NAC domain-containing protein 72          | cq5_B         | 3807048          | 3808199          | 1152        | 4        | 278        |
| 54 | AUR62022486        | CqNAC72        | NAC072: NAC domain-containing protein 72          | cq1_B         | 96255823         | 96265494         | 9672        | 6        | 386        |
| 55 | AUR62029344        | CqNAC72        | NAC072: NAC domain-containing protein 72          | cq12_A        | 51286101         | 51287415         | 1315        | 4        | 298        |
| 56 | AUR62021364        | CqNAC73        | NAC073: NAC domain-containing protein 73          | cq1_B         | 16997945         | 17004953         | 7009        | 6        | 167        |
| 57 | AUR62033276        | CqNAC73        | NAC073: NAC domain-containing protein 73          | cq2_A         | 52375299         | 52382203         | 6905        | 5        | 319        |
| 58 | AUR62031086        | CqNAC73        | NAC073: NAC domain-containing protein 73          | cq2_A         | 5673254          | 5676404          | 3151        | 2        | 251        |
| 59 | AUR62014879        | CqNAC73        | NAC073: NAC domain-containing protein 73          | cq1_B         | 32318489         | 32327115         | 8627        | 2        | 252        |
| 60 | AUR62026259        | CqNAC73        | NAC073: NAC domain-containing protein 73          | cq14_A        | 24108385         | 24115692         | 7308        | 4        | 191        |
| 61 | AUR62043434        | CqNAC73        | NAC073: NAC domain-containing protein 73          | cq0_          | 19574734         | 19575424         | 691         | 3        | 138        |
| 62 | AUR62036063        | CqNAC73        | NAC073: NAC domain-containing protein 73          | cq15_A        | 45801852         | 45808337         | 6486        | 3        | 204        |
| 63 | <b>AUR62041525</b> | <b>CqNAC78</b> | <b>NAC078: NAC domain-containing protein 78 *</b> | <b>cq5_B</b>  | <b>57361157</b>  | <b>57364321</b>  | <b>3165</b> | <b>6</b> | <b>550</b> |
| 64 | AUR62043491        | CqNAC78        | NAC078: NAC domain-containing protein 78          | cq12_A        | 28893343         | 28901372         | 8030        | 4        | 393        |
| 65 | <b>AUR62041539</b> | <b>CqNAC78</b> | <b>NAC078: NAC domain-containing protein 78 *</b> | <b>cq12_A</b> | <b>20501797</b>  | <b>20505411</b>  | <b>3615</b> | <b>6</b> | <b>556</b> |
| 66 | AUR62043741        | CqNAC78        | NAC078: NAC domain-containing protein 78          | cq1_B         | 84648679         | 84662099         | 13421       | 4        | 355        |
| 67 | AUR62006885        | CqNAC81        | NAC081: Protein ATAF2                             | cq5_B         | 74997825         | 75001903         | 4079        | 4        | 329        |
| 68 | AUR62006407        | CqNAC82        | NAC082: NAC domain-containing protein 82          | cq7_A         | 90788443         | 90789561         | 1119        | 1        | 372        |
| 69 | AUR62029755        | CqNAC82        | NAC082: NAC domain-containing protein 82          | cq17_B        | 59895805         | 59896911         | 1107        | 1        | 368        |
| 70 | AUR62006837        | CqNAC82        | NAC082: NAC domain-containing protein 82          | cq5_B         | 75576113         | 75577156         | 1044        | 2        | 319        |
| 71 | AUR62000493        | CqNAC82        | NAC082: NAC domain-containing protein 82          | cq12_A        | 5522447          | 5523436          | 990         | 1        | 329        |
| 72 | AUR62028872        | CqNAC83        | NAC083: NAC domain-containing protein 83          | cq6_B         | 3320845          | 3322156          | 1312        | 4        | 257        |
| 73 | AUR62005686        | CqNAC83        | NAC083: NAC domain-containing protein 83          | cq14_A        | 55484398         | 55485672         | 1275        | 4        | 256        |
| 74 | AUR62018752        | CqNAC86        | NAC086: NAC domain-containing protein 86          | cq16_B        | 75482814         | 75484845         | 2032        | 4        | 325        |
| 75 | AUR62007247        | CqNAC86        | NAC086: NAC domain-containing protein 86          | cq13_A        | 3165461          | 3167486          | 2026        | 4        | 327        |
| 76 | AUR62010080        | CqNAC86        | NAC086: NAC domain-containing protein 86          | cq15_A        | 5122099          | 5126510          | 4412        | 4        | 352        |
| 77 | AUR62013074        | CqNAC86        | NAC086: NAC domain-containing protein 86          | cq17_B        | 79021049         | 79025517         | 4469        | 4        | 352        |
| 78 | <b>AUR62020251</b> | <b>CqNAC89</b> | <b>NAC089: NAC domain-containing protein 89 *</b> | <b>cq18_B</b> | <b>32521438</b>  | <b>32523891</b>  | <b>2454</b> | <b>5</b> | <b>430</b> |

|           |                    |                |                                                             |               |                 |                 |             |          |            |
|-----------|--------------------|----------------|-------------------------------------------------------------|---------------|-----------------|-----------------|-------------|----------|------------|
| 79        | AUR62001522        | CqNAC90        | NAC090: NAC domain-containing protein 90                    | cq7_A         | 101656423       | 101660122       | 3700        | 4        | 268        |
| 80        | AUR62020261        | CqNAC90        | NAC090: NAC domain-containing protein 90                    | cq18_B        | 32661219        | 32663097        | 1879        | 3        | 258        |
| 81        | AUR62006223        | CqNAC90        | NAC090: NAC domain-containing protein 90                    | cq15_A        | 2810155         | 2814517         | 4363        | 3        | 276        |
| 82        | AUR62036991        | CqNAC90        | NAC090: NAC domain-containing protein 90                    | cq17_B        | 56071227        | 56073064        | 1838        | 2        | 151        |
| 83        | AUR62039815        | CqNAC94        | ANAC094: Putative NAC domain-containing protein 94          | cq4_A         | 38381888        | 38383418        | 1531        | 3        | 385        |
| 84        | AUR62034400        | CqNAC94        | ANAC094: Putative NAC domain-containing protein 94          | cq1_B         | 55324061        | 55325551        | 1491        | 3        | 385        |
| 85        | AUR62027152        | CqNAC94        | ANAC094: Putative NAC domain-containing protein 94          | cq15_A        | 1809369         | 1810776         | 1408        | 3        | 222        |
| 86        | AUR62012948        | CqNAC94        | ANAC094: Putative NAC domain-containing protein 94          | cq17_B        | 80277875        | 80278498        | 624         | 2        | 146        |
| 87        | AUR62040120        | CqNAC94        | ANAC094: Putative NAC domain-containing protein 94          | cq6_B         | 34103882        | 34105819        | 1938        | 5        | 390        |
| <b>88</b> | <b>AUR62032488</b> | <b>CqNAC94</b> | <b>ANAC094: Putative NAC domain-containing protein 94 *</b> | <b>cq14_A</b> | <b>41611790</b> | <b>41618469</b> | <b>6680</b> | <b>8</b> | <b>516</b> |
| 89        | AUR62038748        | CqNAC98        | NAC098: Protein CUP-SHAPED COTYLEDON 2                      | cq1_B         | 106129053       | 106135097       | 6045        | 4        | 294        |
| 90        | AUR62020634        | CqNAC98        | NAC098: Protein CUP-SHAPED COTYLEDON 2                      | cq4_A         | 16178718        | 16185086        | 6369        | 4        | 297        |
| 91        | AUR62019477        | CqNAC98        | NAC098: Protein CUP-SHAPED COTYLEDON 2                      | cq12_A        | 48919545        | 48921791        | 2247        | 3        | 400        |
| 92        | AUR62036158        | CqNAC98        | NAC098: Protein CUP-SHAPED COTYLEDON 2                      | cq5_B         | 11161825        | 11164198        | 2374        | 5        | 324        |
| 93        | AUR62034435        | CqNAC100       | NAC100: NAC domain-containing protein 100                   | cq1_B         | 56919532        | 56920931        | 1400        | 3        | 341        |
| 94        | AUR62018102        | CqNAC100       | NAC100: NAC domain-containing protein 100                   | cq4_A         | 35692016        | 35693362        | 1347        | 3        | 333        |
| 95        | AUR62021652        | CqNAC100       | NAC100: NAC domain-containing protein 100                   | cq8_A         | 9672471         | 9674125         | 1655        | 3        | 361        |
| 96        | AUR62008438        | CqNAC100       | NAC100: NAC domain-containing protein 100                   | cq16_B        | 4681091         | 4683124         | 2034        | 3        | 364        |
| 97        | AUR62021621        | CqNAC100       | NAC100: NAC domain-containing protein 100                   | cq8_A         | 10126416        | 10133113        | 6698        | 4        | 198        |
| <b>98</b> | <b>AUR62028103</b> | <b>CqNTL9</b>  | <b>NTL9: Protein NTM1-like 9 *</b>                          | <b>cq11_B</b> | <b>68788278</b> | <b>68792879</b> | <b>4602</b> | <b>6</b> | <b>630</b> |
| <b>99</b> | <b>AUR62005966</b> | <b>CqNTL9</b>  | <b>NTL9: Protein NTM1-like 9 *</b>                          | <b>cq7_A</b>  | <b>70111368</b> | <b>70115912</b> | <b>4545</b> | <b>6</b> | <b>631</b> |
| 100       | AUR62013541        | CqSMB          | SMB: Protein SOMBRERO                                       | cq3_B         | 65117611        | 65120613        | 3003        | 3        | 346        |
| 101       | AUR62026741        | CqSMB          | SMB: Protein SOMBRERO                                       | cq10_A        | 20749557        | 20757214        | 7658        | 4        | 283        |
| 102       | AUR62005772        | CqFEZ          | FEZ: Protein FEZ                                            | cq14_A        | 56770446        | 56773311        | 2866        | 3        | 446        |
| 103       | AUR62044373        | CqFEZ          | FEZ: Protein FEZ                                            | cq6_B         | 5175069         | 5177844         | 2776        | 3        | 454        |
| 104       | AUR62017681        | CqBRN2         | BRN2: Protein BEARSKIN2                                     | cq0_          | 137754423       | 137760607       | 6185        | 4        | 418        |
| 105       | AUR62000898        | CqNAM-B1       | NAM-B1: NAC transcription factor NAM-B1                     | cq12_A        | 10832642        | 10835485        | 2844        | 3        | 418        |
| 106       | AUR62006836        | CqNAC103       | NAC103: NAC domain containing protein 103                   | cq5_B         | 75580825        | 75581836        | 1011        | 2        | 315        |
| 107       | AUR62004773        | CqNAC28        | NAC domain containing protein 28                            | cq5_B         | 62725181        | 62726259        | 1078        | 2        | 140        |

173 Quinoa NAC genes encode proteins ranging in size from 101 to 631 amino acids (aa) in  
174 length, with an average of 322 aa.

175 Several NAC TFs are present as membrane-bound transcription factors (MTFs) (15). To  
176 identify membrane associated NAC TFs in quinoa, we scanned all of the full length  
177 CqNAC peptide sequences for the presence of  $\alpha$ -helical transmembrane (TM) motives  
178 using the TMHMM server v.2.0. (<http://www.cbs.dtu.dk/services/TMHMM/>). We identified  
179 nine putative membrane-bound CqNACs proteins containing  $\alpha$ -helical TM motives in the  
180 C-terminal region (Table 1).

181 The number of CqNACs we identified in this study is less than the number of NACs in  
182 Arabidopsis and rice. We expected at least double the number of NACs due to the  
183 tetraploid nature of the quinoa genome. However, we found that the total number of  
184 predicted TFs in the genome of quinoa is in fact even slightly less than the total number  
185 of TFs in Arabidopsis (2093 CqTFs in quinoa compared with 2296 TFs in Arabidopsis, S1  
186 Fig, S1 Table). The number of TFs in each family is almost 0.8-fold (median) compared  
187 with Arabidopsis, with only two families showing 3 and 5 times more TFs in quinoa  
188 compared with Arabidopsis i.e., the FAR1 and LFY families, respectively. Moreover, fewer  
189 sequences belonging to the heat shock proteins family 70 (HSP70) were identified in  
190 quinoa compared with Arabidopsis (quinoa has 16 HSP70 members, while Arabidopsis  
191 has 18 members) (26). However, by comparing the number of CqNAC genes in quinoa  
192 with its close relatives, quinoa has more NACs than spinach (*Spinacia oleracea*) and  
193 sugar beet (*Beta vulgaris*), which have 80 and 59 NACs genes, respectively.

## 194 **2.2 Chromosomal location and gene duplication of quinoa CqNAC genes**

195 In total, 103 CqNACs are localized to the 18 chromosomes of quinoa and only four  
196 CqNACs could not be mapped to any chromosome and are therefore assigned to  
197 chromosome zero (Table 1). CqNACs genes appear to be equally distributed between  
198 sub-genome A and B (S2a Fig); however, CqNACs are unequally distributed across the  
199 chromosomes (S2b Fig). The largest number of CqNACs genes are localized to  
200 chromosome 1 (13 CqNACs, ~12.38 %), followed by chromosome 12 (12 CqNACs,  
201 ~11.43 %), while chromosome 11 and chromosome 13 have the smallest number of  
202 CqNACs (only two CqNACs ~1.9 % are localized to chromosome 11 and three CqNACs  
203 ~2.86 % are localized to chromosome 13) (S2b Fig).

204 We noticed that in most cases, we found two or more quinoa *CqNAC* genes for every  
205 Arabidopsis orthologue and thus we grouped quinoa CqNACs as duplicated and un-  
206 duplicated genes. The duplicated group consists of 30 duplicated CqNAC genes (each  
207 gene has from 2 to 7 copies) giving a total number of 97 genes distributed between  
208 subgenome A and subgenome B. The un-duplicated CqNACs consist of 10 CqNACs  
209 genes (Fig 2a,b). In total, only 40 Arabidopsis NAC genes have orthologues in the  
210 genome of quinoa (36.5% of Arabidopsis NACs).

211

212 **Fig 2. Duplicated and non-duplicated quinoa *CqNAC* genes.**

213 a) Copy number of each quinoa *CqNAC* gene. b) Pie chart shows the percentage of  
214 duplicated and unduplicated *CqNAC*s. The percentage of genes are calculated based on  
215 the total number of *CqNAC*s orthologues to Arabidopsis *NAC*s (40 *NAC* genes).

216

217 We performed synteny analysis using MCScanX to reveal the relationship between the  
218 duplicated CqNACs, and to determine if these duplicated genes form homologous pairs  
219 and if these homologs are located between subgenomes A and B (to form homoeologous

220 pairs). Synteny analysis revealed that different types of homology occurs between the  
221 duplicated genes, which we classify as: (1) genes that form a homoeologous pair located  
222 in the same phylogenetic cluster (S3a Table) – in quinoa, this applies to 52 genes (26  
223 pairs, 48.6% of all of the genes); (2) genes that appear to form a homoeologous pair but  
224 are located in different phylogenetic clusters - 18 genes in quinoa (16.8%), (S3b Table);  
225 (3) genes that have more than one homolog located in different clusters - 10 genes in  
226 quinoa (9.3%) (S3c Table); and (4) genes that have no homolog according to our analyses  
227 - 27 genes in quinoa (25.2%) (S3d Table). Although some of these genes are duplicated,  
228 such as the orthologue of *AtJUB1*, none of the duplicated copies have a homoeolog. The  
229 absence of some homoeolog copies in some of the *CqNAC* genes suggests that gene  
230 loss occurred during the evolution of quinoa, causing some gene loss in the NAC family.  
231 To confirm this, the sequences of the two progenitor genomes needs to be investigated.  
232 Similar findings have been observed in the WRKY TF family in quinoa, where some of  
233 the homologous copies of some of the WRKY genes have been lost (25).

### 234 **2.3 Phylogenetic analysis of the NAC TFs family in quinoa and Arabidopsis**

235 We constructed a Neighbor-Joining (N-J) phylogenetic tree to study the relationship  
236 between quinoa CqNACs. The NAC domain of 107 quinoa NAC proteins was used in the  
237 phylogenetic construction. From the phylogenetic tree (and according to the bootstrap  
238 values), quinoa NAC proteins can be classified into two major groups (Fig 3a). Group I  
239 has the largest number of CqNACs (96 CqNACs) and is subdivided into 15 subgroups  
240 (Fig 3b). Group II contains 11 CqNACs.

241

242 **Fig 3. Phylogenetic tree of quinoa CqNACs.**

243 a) The phylogenetic tree was constructed in MEGA 7.0 using the Neighbour-Joining (NJ)  
244 method with 1000 bootstrap interactions based on the multiple sequence alignment of  
245 107 amino acid sequences of NAC domains belonging to the NAC proteins from  
246 *Chenopodium quinoa*. Nodes that have a bootstrap value of less than 50 are collapsed.  
247 The tree divided CqNACs into two major groups: Group I (with blue background) and  
248 Group II (with pink background). Group I is further subdivided into 15 subgroups that have  
249 different background colours. b) Details of the subgroups from the phylogenetic tree in  
250 (a).

251

252 Generally, most of the quinoa CqNACs form sister pairs (there are 49 pairs) except for  
253 nine CqNACs that occur as a single CqNAC (Fig 3b). These results indicate that genes  
254 in each subgroup might originate from the same duplication event. Similar phylogenetic  
255 topologies have been also found in other plants with duplicated genomes, such as in  
256 switchgrass (28). For most NACs, closely related members in the same phylogenetic  
257 subgroup share a similar exon/intron structure (number and length), with few exceptions  
258 (Fig 4).

259

260 **Fig 4. Exon/ intron structure of quinoa CqNAC genes belonging to different**  
261 **phylogenetic subgroups.**

262

263 To find the phylogenetic relationship between quinoa and Arabidopsis, we constructed  
264 another phylogenetic tree, in this case from the alignments of the full-length sequences  
265 of NAC proteins from Arabidopsis (110 seq.) and quinoa (107 seq.). (Fig 5). The  
266 phylogenetic tree divided NACs into different sub-groups, consistent with the previous  
267 classification (34). The bootstrap values were sometimes low; however, this was also  
268 reported in previous studies (35-39). NAC TFs from the same phylogenetic group are  
269 likely to have a similar function. For instance, the NAM subfamily includes NACs that



270 function in shoot boundary formation (CUC1/2/3) (40, 41), while NACs belonging to  
271 subfamily OsNAC7 are involved in secondary wall formation (Vascular related NAC-  
272 Domain proteins “VNDs” (42) and in root development (SMBs (43)). The OsNAC8 family  
273 are another example, which includes NACs involved in stress response (ANAC019,  
274 ANAC055 and ANAC072) (44). Interestingly, there is a subgroup of Arabidopsis NACs  
275 that are absent in quinoa (subgroups 8, 16 and 18), might have been lost during quinoa  
276 evolution. Subgroups 8, 16 and 18 contain mostly unknown NACs, where the function  
277 has not been described yet. There are only four genes previously described, ANAC005  
278 involved in xylem formation (45), NTM1 involved in cell division (46) and two genes  
279 involved in abiotic stress, NTM2 and NAC67 (47, 48). Quinoa has a high tolerance to  
280 salinity and water deficit; it is possible, that the absence of these genes contributes to  
281 quinoa’s tolerance. There are only two subgroups of NACs for which quinoa has a larger  
282 number of members than Arabidopsis, and there are three groups that quinoa is missing  
283 (S4 Table). This may explain why quinoa has less NACs than Arabidopsis.

284



285 **Fig 5. Phylogenetic relationship of NAC proteins from Arabidopsis and Quinoa.**

286 The phylogenetic tree was constructed in MEGA 7.0 using the Neighbor-Joining (NJ)  
287 method with 1000 bootstrap interactions based on multiple sequence alignment of 107  
288 amino acid sequences of full-length peptide sequence from *Chenopodium quinoa* and  
289 110 sequences from Arabidopsis thaliana. The tree was divided into different subgroups  
290 and named according to the classification of OoKa et al. (2013). Red circles represent  
291 NAC peptides from Arabidopsis and green triangles represent peptides from quinoa. Blue  
292 boxes represent subgroups that have members from both Arabidopsis and quinoa, yellow  
293 boxes represents subgroups that have larger number of quinoa NACs than Arabidopsis  
294 NACs and pink boxes represents subgroups that have members from Arabidopsis only.

295

## 296 **2.4 Transcriptional analyses of quinoa *CqNAC* genes**

### 297 **2.4.1 Expression of duplicated genes (functionalization of duplicated genes)**

298 The high proportion of gene duplication among quinoa *CqNAC* genes raises the question  
299 of their functional redundancy. During the evolutionary process, duplicated genes may  
300 have obtained non-functionalization, neo-functionalization or sub-functional redundancy  
301 (49), which could be indicated by differences in their patterns of expression. Thus, we  
302 investigated the expression of duplicated *CqNACs* in the shoots and roots of quinoa  
303 plants grown in soil and in a hydroponic system under normal growth conditions. We used  
304 the available RNAseq data for quinoa accession QQ74 assessed under different stress  
305 conditions, such as heat, drought, salinity and low-phosphate. First, to determine if all of  
306 the *CqNACs* that we identified in this study were expressed, we calculated their  
307 cumulative expression in all of the samples and all of the conditions. We found that five  
308 genes were not expressed at all under any of the conditions used in this work, and four  
309 genes were expressed only at very low levels (Fragments Per Kilobase of transcript per  
310 Million mapped reads, FPKM<1) (S5 Table).

311 Expression analysis of the duplicated genes showed a different expression pattern  
312 between the shoots and the roots among the duplicated copies (Fig 6). Some of the  
313 duplicated *CqNAC* genes have a similar expression pattern, which could suggest a similar  
314 or redundant function. Other duplicated *CqNAC* genes have different expression patterns,  
315 suggesting that some of the duplicated copies may have developed different functions.  
316 Similar expression patterns were also observed in diploid cotton *Gossypium raimondii*  
317 (30) and Tartary buckwheat (*Fagopyrum tataricum*) (50). We also noticed that not all of  
318 the duplicated copies are expressed. For example, in two of the genes that are triplicated

319 and one of the genes that are found in four copies, only two copies are expressed and  
320 the other two copies are not expressed.

321

322 **Fig 6. Heat map of the expression of duplicated *CqNAC* in the shoots and roots of**  
323 **quinoa.**

324 Quinoa plants were grown in hydroponic system under normal growth conditions.  
325 a) Genes duplicated two times, b) Genes duplicated three times, c) Genes duplicated four  
326 times, d) Genes duplicated more than four times, and e) Genes that have a single copy.  
327 The corresponding expression values are in S6 Table.  
328

329 NAC TFs have long been known as an important TF family that are involved in regulating  
330 plant growth, development and responses to stress (1, 2, 51-53). To detect NACs that  
331 are potentially involved in root and shoot development, we identified the expression of all  
332 of the 107 putative quinoa NAC TFs genes in the shoots and roots of quinoa plants grown  
333 under growth conditions in soil as well as in hydroponic conditions (S6 Table). To find the  
334 genes that are potentially involved in root or shoot development, the expression of  
335 *CqNACs* in the shoots was compared to their expression in the roots. We chose genes  
336 that were significantly differentially expressed (DE) between shoot and root (FDR=0.05),  
337 as these might be involved in regulating root or shoot development. Those *CqNACs*  
338 comprise 24 genes (19 genes being more expressed in roots “root specific” and five genes  
339 being more induced in the shoots “shoot specific”) (Fig 7 and S3 Fig and S6 Table). The  
340 expression of *CqNACs* in the shoots and roots of plants grown in soil and in hydroponic  
341 showed a consistent expression pattern. However, there are a few differences in the  
342 number of significantly differentially expressed (DE) genes. Among those NAC genes that  
343 are significantly more expressed in the roots than the shoots (in both soil and hydroponic)  
344 is the *AUR62013541* gene, which is the ortholog of the well-characterized *SOMBRERO*

345 (*SMB*) gene. *SMB* has been shown to be involved in controlling the reorientation and  
346 timing of cell division in root stem cells (43). *AUR62000536* is a second example, the  
347 orthologue of the Arabidopsis *AtNAC2* gene. *AtNAC2* is specifically expressed in the roots  
348 and significantly increases the number of lateral root formation in response to ethylene  
349 and auxin signalling in Arabidopsis (54). In addition, *AUR62032816* (the orthologue of  
350 *ANAC029*) is strongly and significantly induced in the roots compared to the shoots.  
351 *ANAC029* was found to be involved in root morphogenesis in *Medicago truncatula* (55).  
352 *AUR62004554* is another example, which is the orthologue of Arabidopsis *ANAC043*. In  
353 Arabidopsis, *ANAC043* belongs to secondary wall NAC genes (SWN), which are also  
354 known as *secondary wall thickening promoting factor1 (NST1)*; however, its role in root  
355 growth and development has not yet been identified (56). With respect to shoot related  
356 *CqNACs*, we identified only five *CqNACs* to be significantly more expressed in the shoots  
357 than the roots, i.e., the two orthologues of *ANAC072* (*AUR62015630*, *AUR62029344*),  
358 and the two orthologs of *ANA0C94* (*AUR62032488*, *AUR62040120*) and the orthologue  
359 of *NAM-B* (*AUR62000898*). The function of these genes in shoot formation has not been  
360 identified before. Thus, future studies should test if those genes are indeed involved in  
361 shoot formation or shoot related processes in quinoa.

362

363 **Fig 7. Heat map of the expression of *CqNAC* significantly differentially expressed**  
364 **(DE) between roots and shoots.**

365 Expression level (in FPKM) of significantly DE genes between shoot and root of plants  
366 grown in a hydroponic system or soil. Significant difference is calculated at FDR=0.05.

367

## 368 **2.4.2 Expression of quinoa *CqNAC* TFs in response to abiotic stresses**

369 NAC TFs have been identified as an important regulator of stress responses, and given  
370 that quinoa has a high stress tolerance to abiotic stresses, we hypothesize that NAC TFs  
371 are involved in quinoa's adaptation to stress tolerance. Here, we examine the expression  
372 of all of the putative quinoa NACs in response to different abiotic stresses (salt, drought,  
373 heat and phosphate starvation) using RNAseq previously generated (27). Around 35-48  
374 *CqNACs* are DE in the roots or shoots of quinoa plants exposed to one of the abiotic  
375 stresses examined in this study. However, the largest number of genes being DE were in  
376 the roots of the plants that were exposed to phosphate starvation (Fig 8a).

377

### 378 **Fig 8. Quinoa NACs differentially expressed in response to different abiotic** 379 **stresses.**

380 a) Number of genes differentially expressed in the shoots and roots of quinoa plants  
381 exposed to different abiotic stresses, including salt, drought, heat and phosphate  
382 starvation. b) Heat map of *CqNACs* DE after salt stress. c) Heat map of *CqNACs* DE after  
383 drought stress. d) Heat map of *CqNACs* DE after heat stress. e) Heat map of *CqNACs*  
384 DE after phosphate starvation. The significance between stress and control is calculated  
385 at FDR=0.05. f) Venn diagram illustrating the overlap between different stress-responsive  
386 *CqNAC* genes (only significant DE genes).

387

388 NAC genes are known to be involved in salt stress response and tolerance in Arabidopsis  
389 and many other plant species (57-60). Here, we identified nine genes in quinoa that were  
390 significantly upregulated in the shoots, roots or both in response to salt stress (5 genes  
391 in shoot, 1 gene in root and 3 genes in both shoot and root) (Fig 8b). Interestingly, some  
392 of these genes are orthologues of NACs genes, which have been previously identified as  
393 salt responsive genes and are known to play a role in salinity tolerance when they are

394 overexpressed in plants. For example, *AUR62028872* and *AUR62005686* are two  
395 orthologues of the Arabidopsis *ANAC083* (*VND-INTERACTING 2* or *VIN2*), a negative  
396 regulator of xylem vessel formation. In Arabidopsis, *ANAC083* was induced by salt  
397 treatment and its overexpression enhanced salinity tolerance by directly binding to the  
398 promoters of two important genes involved in salt stress response (61). Our data showed  
399 a similar trend as the two quinoa orthologues of *ANAC083* were significantly induced by  
400 salt stress. *AtNAP* (*ANAC029*) was identified as another NAC TF gene that is induced by  
401 salt stress (62). *AtNAP* functions as a negative regulator of salt stress response via  
402 repressing the expression of *AREB1* and thus its overexpression increases the plants'  
403 sensitivity to salt stress (62). We found a similar expression trend in quinoa as the quinoa  
404 orthologue of *AtNAP*, *AUR62005821*, was also induced by salt stress in both shoot and  
405 root. Two other genes that are also significantly upregulated by salt treatment are  
406 *AUR62000536*, the *NAC2* orthologue and *AUR62029344*, the *ANAC072* orthologue –  
407 those two genes were found to be induced by salt stress, and plants were found to have  
408 enhanced stress tolerance when they were overexpressed separately (10, 63). Another  
409 example is *AUR62006885*, the *ATAF2* orthologue, which has been previously identified  
410 to be induced by salt stress and pathogen attack (64, 65). Here we report a similar  
411 expression pattern in quinoa as it is also induced in the shoots and roots of quinoa plants  
412 in response to salt stress.

413 Some salt responsive *CqNAC* genes, such as *AUR62036626*, *AUR62041525* and  
414 *AUR62043497* (the orthologues of Arabidopsis *ANAC068*, *ANAC078* and *ANAC021*,  
415 respectively), are significantly DE in response to salt, but their roles in response to salt

416 stress have not been studied before. These genes have the potential to be involved in  
417 salt stress response and adaptation in quinoa.

418 Quinoa is known to have a high drought tolerance and many NACs have been found to  
419 be involved in drought tolerance in rice and Arabidopsis (57-60). After drought treatment,  
420 expression of sixteen *CqNAC* genes were significantly different between the stress and  
421 control in the shoots or roots, or both (Fig 8c). Some of these significantly DE genes are  
422 orthologous to well-known drought responsive NAC genes in other plant species. For  
423 example, in Arabidopsis, overexpression of *RD26/ANAC072* and *ATAF1/ANAC002*  
424 confers drought tolerance (44, 66). We found that in quinoa the *ATAF-1* orthologue  
425 *AUR62000536* and the two orthologues of *ANAC072* *AUR62015630* and *AUR62029344*  
426 were upregulated in response to drought stress, which is consistent with their role in  
427 drought tolerance as for Arabidopsis (44, 66). *AUR62005821* and *AUR62032816*, the  
428 two orthologues of Arabidopsis *AtNAP*, present two further examples, which we found to  
429 be significantly upregulated in the shoots and downregulated in the roots in response to  
430 drought stress. In rice, *OsNAP* functions as a positive regulator of drought tolerance (59).  
431 In addition, the wheat *TaNAP29* enhances drought tolerance in transgenic Arabidopsis  
432 (60). We identify ten genes that are significantly differentially expressed, but their roles in  
433 response to drought stress have not been previously identified.

434 The focus of the role of NAC TFs in heat response has only recently emerged and there  
435 are only a few reports focusing on their role in heat tolerance. Thus, their role has not  
436 been studied as thoroughly as other stresses (53, 67-70). Here, we identified 13 genes  
437 that were significantly differentially expressed in response to heat stress in the shoots or  
438 roots or both. Interestingly, *AUR62015630* and *AUR62029344* (the two orthologues of

439 *ANAC072/RD26*) were downregulated in both the shoots and roots. In our previous study  
440 of the transcriptomic analysis of NAC TFs in response to heat priming in Arabidopsis, we  
441 found that *RD26* and *AtNAP* were responsive to heat priming (Alshareef *et al*,  
442 unpublished). This suggests the possible role of NAC TF genes in regulating heat stress  
443 response in quinoa.

444 Adequate supply of inorganic phosphate ( $P_i$ ) is important for plant growth and  
445 development, whereby low levels of  $P_i$  in soil adversely affect plant growth and  
446 development. Thus, plants have evolved several regulatory mechanisms to adapt to  
447 phosphorus deficiency and optimize  $P_i$  uptake and assimilation (57). Here, we found that  
448 the largest number of quinoa NAC TF genes was induced by phosphate deficiency  
449 treatment. Nineteen genes were significantly upregulated in the roots or shoots or both  
450 (16 *CqNAC* genes were upregulated in the roots and 10 *CqNACs* were upregulated in in  
451 the shoots in response to phosphate deficiency (Fig 8e). In Arabidopsis, it has been  
452 reported that five NAC genes are induced by more than a 2 fold change in response to  
453 P-starvation, namely *At3g15500/AtNAC3*, *At3g04070/ANAC047*, *At2g43000/JUB1*,  
454 *At1g52890/ANAC019*, *At1g02220/ANAC003* (71-73) and (Hammond and Bennet, (AT-  
455 O61 Genevestigator). However, none of these gene orthologues in quinoa are  
456 significantly differentially expressed in our data.

457 From the above results on the transcriptional responses of quinoa NACs to different  
458 abiotic stresses, we found there are three *CqNACs* that are differentially expressed in  
459 response to all of the stresses, i.e., *AUR62029344*, *AUR62000536* and *AUR62006885*,  
460 which are the orthologues of *ANAC072*, *ANAC002* and *ATAF2*, respectively (Fig 8e). This  
461 suggests the presence of a crosstalk pathway that mediates stress tolerance between



462 different stresses. Although these genes are common between stresses, they have  
463 different expression patterns in response to different stresses and perhaps they are  
464 involved in different gene regulatory networks. For instance, *AUR62029344*, a  
465 *ANAC072/RD26* orthologue, was induced in the shoots and roots of quinoa plants after  
466 salt, phosphate and drought stresses, and only downregulated in response to heat stress  
467 in both shoots and roots.

468 The consistent transcriptional responses between *CqNACs* (in response to abiotic stress)  
469 and those that have been reported previously for *Arabidopsis* or other plant species,  
470 indicate a conserved function of NACs across different species and the possible sharing  
471 of a common stress tolerance mechanism. However, we have also identified some  
472 *CqNACs* that are stress responsive, transcriptionally, but their function have not been  
473 identified previously. These NACs may participate in a novel stress tolerance in quinoa  
474 plants.

#### 475 **2.4.3 qRT-PCR analysis of stress responsive *CqNACs***

476 To verify the response of *CqNACs* to different abiotic stresses, we conducted an  
477 additional salinity, drought and heat experiments and investigated the expression of some  
478 selected *CqNAC* by qRT-PCR. We identified the selected *CqNACs* to be DE in response  
479 to stress according to our RNAseq data and/or are orthologue to NACs functionally  
480 annotated as a stress responsive gene in other plant species. We analysed the  
481 expression of six salt stress responsive *CqNAC* genes in response to salt stress (300 mM  
482 NaCl). These genes are orthologues of *Arabidopsis ATAF1*, *ATAF2*, *ANAC072*,  
483 *ANAC078* and *ANAC083* (Fig 9a). The same trend for changes in expression were  
484 observed for all of the tested genes when comparing qRT-PCR and RNAseq (S3a Fig),

485 which confirms their response to salt stress. Among these genes, we tested the  
486 expression of the two copies of *ANAC083* orthologues (*AUR62037478*, *AUR62043497*)  
487 and the results showed a stronger response in one of the copies (*AUR62043497*)  
488 compared to the other copy (*AUR62037478*).

489

490 **Fig 9. qRT-PCR analysis of some selected *CqNACs* in response to different abiotic**  
491 **stresses.**

492 a) Relative expression of *CqNACs* after salt treatment relative to control. b) Relative  
493 expression of *CqNACs* after drought treatment relative to control. a) Relative expression  
494 of *CqNACs* after heat treatment relative to control. The expression level represents the  
495 mean of three independent biological replicates. The error bar is standard error of the  
496 mean.

497

498 In response to drought stress, we analysed the expression of nine genes (Fig 9b). The  
499 results showed that the expression pattern of some of the *CqNAC* genes in response to  
500 drought stress is consistent between RNAseq and qRT-PCR, except for four genes  
501 (*ATAF1*, *ANAC083* and the two copies of *ANAC029*), which showed a different  
502 expression pattern between RNAseq and qRT-PCR (S3b Fig). We also analysed the  
503 expression pattern between the copies of the duplicated genes, i.e., the orthologues of  
504 Arabidopsis *ANAC100*, *ANAC072* and *ANAC029*. The orthologues of Arabidopsis  
505 *ANAC100* and *ANAC072* showed a similar expression pattern between the duplicated  
506 copies, which could suggest that both of the copies have a similar function. The two  
507 copies of *ANAC072* showed an opposite expression pattern in response to drought  
508 between the two copies (RNAseq and qRT-PCR) (Fig 9b) raising the possibility that these  
509 two genes have a different function in response to drought stress in quinoa.

510 In response to heat stress, we analysed the expression of eight genes. The expression  
511 of all of the *CqNAC* genes in response to heat stress was consistent between the RNAseq

512 and qRT-PCR for six of the genes. Two genes appeared to have opposite expression  
513 patterns between the RNAseq and qRT-PCR, the orthologues of Arabidopsis *ANAC083*  
514 and *ANAC072* (S3c Fig). The experiments for heat stress for RNAseq and qRT-PCR  
515 studies were performed under different conditions. The heat stress for RNAseq samples  
516 was for much shorter duration, which may explain the different expression pattern of some  
517 genes.

518 Among the analysed genes, there are some duplicated genes, namely the orthologues of  
519 Arabidopsis *ANAC100*, *ANAC083* and *ANAC072*. In the two duplicated genes (*ANAC100*  
520 and *ANAC083*), both copies of each gene showed a similar expression pattern in  
521 response to heat stress. This is similar to what we have seen in response to drought  
522 stress for these two genes. However, the two copies of *ANAC072* showed a different  
523 expression pattern in response to heat stress, suggesting that these two copies of  
524 *ANAC072* gene may have a different function (Fig 9c).

525 To conclude, the high consistency of *CqNAC* expression between the RNAseq and qRT-  
526 PCR experiments confirmed their response to abiotic stress. Moreover, by analysing the  
527 expression among the duplicated genes in response to stress, our results indicate that  
528 there is a similarity between the expression pattern and some of the duplicated genes,  
529 which indicates similar or redundant functions of these duplicated copies. However, in  
530 some duplicated genes, the expression of one copy is weaker or different (opposite) to  
531 the expression of the other copy, which may suggest different functions of the duplicated  
532 genes in response to stress. We propose that these genes should be further investigated  
533 for their role in stress responses and potentially stress tolerance.

534

### 535 **3. Conclusions**

536 In conclusion, this study provides a comprehensive identification and characterization on  
537 the transcriptional level of the NAC TFs family in quinoa. We identified 107 NAC TFs in  
538 the genome of quinoa plants. We phylogenetically and functionally classified these NACs  
539 into different phylogenetic subgroups, in alignment with previously identified NACs in  
540 Arabidopsis. This functional classification was also supported by the global expression  
541 analysis that we carried out in two tissues (shoots and roots) in response to abiotic  
542 stresses, as several NACs involved in root development were significantly differentially  
543 expressed in the root of quinoa plants. Similarly, we found several NACs responded  
544 transcriptionally to different abiotic stresses in a similar manner to previously  
545 characterized NACs in Arabidopsis and other plants species. This indicates that some of  
546 the quinoa NAC TFs have a similar function to previously identified NACs. Our results  
547 provide valuable information for further functional research of NAC TF in quinoa and their  
548 role in its adaptation to different stresses.

### 549 **4. Materials and Methods**

#### 550 **4.1 Sequence database search**

551 We employed three approaches to identify putative NAC family genes in quinoa. In the  
552 first approach, we searched for peptides that have a protein family (Pfam) (PF02365) in  
553 the genome of quinoa in the phytozome database version12 (phytozome,  
554 <http://www.phytozome.net>, version 12). In the second approach, we downloaded all  
555 protein sequences of the quinoa (44,776 peptide sequences) from phytozome database

556 (phytozome, <http://www.phytozome.net>, version 12), and we used these sequences as a  
557 query in the transcription factors prediction server from PTFDB. In the third approach, we  
558 used a Basic Local Alignment search tool (BLASTp); the protein sequences of the 110  
559 NAC domain of *Arabidopsis thaliana* (*Arabidopsis*) were used to BLASTp against the  
560 quinoa QQ74 peptides. We selected the protein sequence with E-value of  $< 1e^{-10}$  as a  
561 candidate NAC gene, keeping only alignments that cover at least 60% of the query length  
562 (*Arabidopsis* sequences). We downloaded sequences of *Arabidopsis* and rice NAC  
563 proteins from Phytozome database version12. We considered peptide sequences that  
564 had less than 100 residues to be truncated proteins and thus they were removed from the  
565 analysis. We confirmed all of the putative NAC proteins by verifying the presence of the  
566 NAC domain with the InterProScan program (<http://www.ebi.ac.uk/Tools/InterProScan/>),  
567 hmmscan function of the HMMER web server  
568 (<https://www.ebi.ac.uk/Tools/hmmer/search/hmmscan>, HmmerWeb version 2.28.0) of  
569 NAM domain (PF02365) (33) and a conserved domain search (CDS) of the NCBI  
570 database.

571 We performed the inference of homologous copies of genes using a software that  
572 searches for multiple collinearity regions (MCScanX) with default parameters. Briefly, we  
573 performed between all quinoa QQ74 peptide sequences against themselves with an E-  
574 value of  $< 1e^{-10}$  and we reported a maximum of 5 best hits. Subsequently, we inferred  
575 pairwise collinear genes from collinear blocks defined by a minimum of 5 homologous  
576 sequences in conserved order. We inferred homologous genes from collinear genes  
577 between A and B sub-genomes.

578 The prediction of membrane-bound NACs proteins was performed using the software  
579 TMHMM (<http://www.cbs.dtu.dk/services/TMHMM/>, server v.2.0) (74).

#### 580 **4.2 Phylogenetic tree analysis**

581 Multiple sequence alignment of the full length protein sequences or NAC domain  
582 sequences was performed using the tool MUSCLE (75) built in the software MEGA 7.0  
583 (76). We constructed the unrooted phylogenetic tree using the software MEGA 7.0 (76)  
584 using the Neighbor-Joining (NJ) method with a bootstrap test value of 1000.

#### 585 **4.3 Gene structure and conserved motif**

586 We used the gene structure display server (GSDS) program (<http://gsds.cbi.pku.edu.cn/>,  
587 version 2.0) (77) to display the organization of exons and introns of NAC genes by  
588 comparing cDNA with the DNA sequences of individual gene.

#### 589 **4.4 Plant material, growth conditions and stress treatment and transcriptomic** 590 **analysis**

591 We used the gene expression (RNAseq) data previously generated (27). Plant growth  
592 conditions, samples collections and stress application have been previously described  
593 (27). Briefly, RNA was isolated from roots and shoots of quinoa plants exposed to different  
594 stresses including drought, heat, salinity and low phosphate conditions. For drought and  
595 heat treatments, plants were grown in soil, for salinity and low phosphate treatments,  
596 plants were grown in hydroponics (along with their respective controls without treatment):

597 Soil grown plants: Plants were grown in soil in a growth chamber under well-watered  
598 conditions at 20°C and 12 h daily light for three weeks and then either left without water  
599 for one week (as drought treatment) or transferred to another growth chamber with 37°C  
600 day and 32°C night temperatures (as heat treatment).

601 Hydroponically grown plants: After germination on agar for two weeks, seedlings were  
602 transferred to aerated tanks containing basal nutrient solution for another week before  
603 either being moved to tanks containing basal nutrient solution lacking  $\text{KH}_2\text{PO}_4$  and  
604 supplemented with a compensatory amount of KCl (as low phosphate treatment) or to  
605 tanks containing basal nutrient solution supplemented with 150 mM NaCl and then  
606 increase to 300 mM NaCl after 24 h (as salinity treatment). Paired-end sequencing of  
607 100-bp libraries was performed using an Illumina HiSeq2000. Three replicates for each  
608 treatment and each tissue were sequenced, one sample for salt treated roots was  
609 excluded as it did not pass quality control.

#### 610 **4.5 Expression analysis of *CqNAC* genes using qRT-PCR**

611 Quinoa accession QQ74 was grown in 10 cm diameter pots with standard potting mix,  
612 under controlled conditions (day/night, 12/12 h, 22/18, 50% humidity, photon flux density  
613  $300\text{-}350 \mu\text{mol m}^{-2} \text{s}^{-1}$ ) in plant growth Biochambers until the 11<sup>th</sup> leaf growth stage (~26  
614 days) before they were subjected to treatment.

615 Plants in all treatment groups, other than drought, were watered on the first day of  
616 treatment by filling their trays with water (or saline water in case of salt stress). Plants  
617 were also watered throughout the course of experiment to maintain pots at a water holding  
618 capacity of 60%, except for salt and drought treatments.

619 For heat stress, plants were moved to a chamber with the same settings as control, only  
620 the temperature was set to day/night 35/30°C. For drought stress, plants were watered  
621 up to 20-30% water holding capacity WHC (For drought plants). For salt treatment, pots  
622 were soaked in 300 mM NaCl solution for four hours.

623 For gene expression analysis, leaf 10 was sampled six days after the treatment, frozen  
624 in liquid nitrogen and then RNA was extracted using the Direct-Zol Plant RNA extraction  
625 kit according to the manufacturer's instruction (Zymo Research, Germany). Quality of the  
626 RNA was assessed using gel electrophoresis and quantity using a NanoDrop. For cDNA  
627 synthesis, 1 µg of high-quality RNA was used to prepare cDNA using the SuperScript III  
628 kit according to the manufacturer's instruction (Life Technologies).

629 We prepared the real time qRT-PCR reaction using the SYBR Green master mix (Applied  
630 Biosystems): cDNA 4 µL, SYBR Green master mix (2X) 5 µL, 1 µL of forward and reverse  
631 primer mix (final concentration of each primer is 0.5 µM). We incubated the reactions in  
632 the ABI PRISM 7900 HT sequence detection system (Applied Biosystems). We set the  
633 reaction using the following conditions: initial step of 95°C for 10 min followed by 40 cycles  
634 of these two steps (95°C for 15 sec, 60°C for 1 min). We used polyubiquitin 10 gene  
635 (*AUR62015654*) as the reference gene for data analysis. The primer sequences of all of  
636 the primers is provided in S7 Table. After 40 reaction cycles, we generated a melting  
637 curve by heating from 60°C to 95°C with a ramp speed of 1.9°C min<sup>-1</sup> to verify  
638 amplification of the desired product.

639 We analysed data using the comparative Ct method as described in Kamranfar, Xue (78).  
640 Briefly, we calculated the delta Ct value ( $\Delta Ct$ ) by normalizing each Ct value with the Ct  
641 value of the reference gene *UBQ10*. Then, the level of gene expression was expressed



642 as the difference between an arbitrary value of 40 and the  $\Delta\text{Ct}$  value (a high  $40-\Delta\text{Ct}$  value  
643 indicates a high gene expression level). We used a threshold of 1.5-fold change to select  
644 differentially expressed genes.

## 645 **Acknowledgements**

646 We thank Noha Saber (KAUST, Saudi Arabia) for practical support.

## 647 5. References

- 648 1. Aida M, Ishida T, Fukaki H, Fujisawa H, Tasaka M. Genes involved in organ  
649 separation in Arabidopsis: an analysis of the cup-shaped cotyledon mutant. *The Plant*  
650 *Cell Online*. 1997;9(6):841-57.  
651
- 652 2. Souer E, van Houwelingen A, Kloos D, Mol J, Koes R. The no apical meristem  
653 gene of *Petunia* is required for pattern formation in embryos and flowers and is expressed  
654 at meristem and primordia boundaries. *Cell*. 1996;85(2):159-70.  
655
- 656 3. Nuruzzaman M, Manimekalai R, Sharoni AM, Satoh K, Kondoh H, Ooka H, et al.  
657 Genome-wide analysis of NAC transcription factor family in rice. *Gene*. 2010;465(1-2):30-  
658 44.  
659
- 660 4. Le DT, Nishiyama R, Watanabe Y, Mochida K, Yamaguchi-Shinozaki K, Shinozaki  
661 K, et al. Genome-wide survey and expression analysis of the plant-specific NAC  
662 transcription factor family in soybean during development and dehydration stress. *DNA*  
663 *research*. 2011;18(4):263-76.  
664
- 665 5. Sablowski RW, Meyerowitz EM. A homolog of NO APICAL MERISTEM is an  
666 immediate target of the floral homeotic genes APETALA3/PISTILLATA. *Cell*.  
667 1998;92(1):93-103.  
668
- 669 6. Uauy C, Distelfeld A, Fahima T, Blechl A, Dubcovsky J. A NAC gene regulating  
670 senescence improves grain protein, zinc, and iron content in wheat. *Science*.  
671 2006;314(5803):1298-301.  
672
- 673 7. Balazadeh S, Riaño-Pachón D, Mueller-Roeber B. Transcription factors regulating  
674 leaf senescence in *Arabidopsis thaliana*. *Plant Biology*. 2008;10(s1):63-75.  
675
- 676 8. Kim YS, Kim SG, Park JE, Park HY, Lim MH, Chua NH, et al. A membrane-bound  
677 NAC transcription factor regulates cell division in *Arabidopsis*. *Plant Cell*.  
678 2006;18(11):3132-44.  
679
- 680 9. Zhong R, Richardson EA, Ye Z-H. Two NAC domain transcription factors, SND1  
681 and NST1, function redundantly in regulation of secondary wall synthesis in fibers of  
682 *Arabidopsis*. *Planta*. 2007;225(6):1603-11.  
683
- 684 10. He XJ, Mu RL, Cao WH, Zhang ZG, Zhang JS, Chen SY. AtNAC2, a transcription  
685 factor downstream of ethylene and auxin signaling pathways, is involved in salt stress  
686 response and lateral root development. *The Plant Journal*. 2005;44(6):903-16.  
687
- 688 11. Ernst HA, Nina Olsen A, Skriver K, Larsen S, Lo Leggio L. Structure of the  
689 conserved domain of ANAC, a member of the NAC family of transcription factors. *EMBO*  
690 *reports*. 2004;5(3):297-303.

- 691  
692 12. Jensen MK, Kjaersgaard T, Nielsen MM, Galberg P, Petersen K, O'Shea C, et al.  
693 The Arabidopsis thaliana NAC transcription factor family: structure-function relationships  
694 and determinants of ANAC019 stress signalling. *The Biochemical journal*.  
695 2010;426(2):183-96.  
696  
697 13. Olsen AN, Ernst HA, Leggio LL, Skriver K. NAC transcription factors: structurally  
698 distinct, functionally diverse. *Trends in plant science*. 2005;10(2):79-87.  
699  
700 14. Olsen AN, Ernst HA, Leggio LL, Skriver K. DNA-binding specificity and molecular  
701 functions of NAC transcription factors. *Plant Science*. 2005;169(4):785-97.  
702  
703 15. Kim SY, Kim SG, Kim YS, Seo PJ, Bae M, Yoon HK, et al. Exploring membrane-  
704 associated NAC transcription factors in Arabidopsis: implications for membrane biology  
705 in genome regulation. *Nucleic Acids Research*. 2007;35(1):203-13.  
706  
707 16. Shen H, Yin Y, Chen F, Xu Y, Dixon RA. A Bioinformatic Analysis of NAC Genes  
708 for Plant Cell Wall Development in Relation to Lignocellulosic Bioenergy Production.  
709 *BioEnergy Research*. 2009;2(4):217-32.  
710  
711 17. Christiansen MW, Holm PB, Gregersen PL. Characterization of barley (*Hordeum*  
712 *vulgare* L.) NAC transcription factors suggests conserved functions compared to both  
713 monocots and dicots. *BMC Res Notes*. 2011;4:302.  
714  
715 18. Yoshiyama K, Conklin PA, Huefner ND, Britt AB. Suppressor of gamma response  
716 1 (SOG1) encodes a putative transcription factor governing multiple responses to DNA  
717 damage. *Proceedings of the National Academy of Sciences*. 2009;106(31):12843-8.  
718  
719 19. Mitsuda N, Hisabori T, Takeyasu K, Sato MH. VOZ; isolation and characterization  
720 of novel vascular plant transcription factors with a one-zinc finger from Arabidopsis  
721 thaliana. *Plant and cell physiology*. 2004;45(7):845-54.  
722  
723 20. Kolano B, McCann J, Orzechowska M, Siwinska D, Temsch E, Weiss-  
724 Schneeweiss H. Molecular and cytogenetic evidence for an allotetraploid origin of  
725 *Chenopodium quinoa* and *C. berlandieri* (Amaranthaceae). *Molecular phylogenetics and*  
726 *evolution*. 2016;100:109-23.  
727  
728 21. Repo-Carrasco-Valencia R, Espinoza C, Jacobsen S-E. Nutritional Value and Use  
729 of the Andean Crops Quinoa (*Chenopodium quinoa*) and Kañiwa (*Chenopodium*  
730 *pallidicaule*)2003. 179-89 p.  
731  
732 22. Isabelle Adolf V, Jacobsen S-E, Shabala S. Salt tolerance mechanisms in quinoa  
733 (*Chenopodium quinoa* Willd.)2013. 43–54 p.  
734

- 735 23. Jacobsen SE, Mujica A, Jensen CR. The Resistance of Quinoa (*Chenopodium*  
736 *quinoa* Willd.) to Adverse Abiotic Factors. Food Reviews International. 2003;19(1-2):99-  
737 109.  
738
- 739 24. Hariadi Y, Marandon K, Tian Y, Jacobsen SE, Shabala S. Ionic and osmotic  
740 relations in quinoa (*Chenopodium quinoa* Willd.) plants grown at various salinity levels.  
741 Journal of experimental botany. 2011;62(1):185-93.  
742
- 743 25. Yue H, Chang X, Zhi Y, Wang L, Xing G, Song W, et al. Evolution and Identification  
744 of the WRKY Gene Family in Quinoa (*Chenopodium quinoa*). Genes. 2019;10(2).  
745
- 746 26. Liu J, Wang R, Liu W, Zhang H, Guo Y, Wen R. Genome-Wide Characterization  
747 of Heat-Shock Protein 70s from *Chenopodium quinoa* and Expression Analyses of  
748 Cqhsp70s in Response to Drought Stress. Genes. 2018;9(2).  
749
- 750 27. Jarvis DE, Ho YS, Lightfoot DJ, Schmöckel SM, Li B, Borm TJA, et al. The genome  
751 of *Chenopodium quinoa*. Nature. 2017;542:307.  
752
- 753 28. Yan H, Zhang A, Ye Y, Xu B, Chen J, He X, et al. Genome-wide survey of  
754 switchgrass NACs family provides new insights into motif and structure arrangements and  
755 reveals stress-related and tissue-specific NACs. Scientific reports. 2017;7(1):3056.  
756
- 757 29. Hu R, Qi G, Kong Y, Kong D, Gao Q, Zhou G. Comprehensive Analysis of NAC  
758 Domain Transcription Factor Gene Family in *Populus trichocarpa*. BMC Plant Biology.  
759 2010;10(1):145.  
760
- 761 30. Shang H, Li W, Zou C, Yuan Y. Analyses of the NAC Transcription Factor Gene  
762 Family in *Gossypium raimondii* Ulbr.: Chromosomal Location, Structure, Phylogeny, and  
763 Expression Patterns. Journal of Integrative Plant Biology. 2013;55(7):663-76.  
764
- 765 31. Sun H, Hu M, Li J, Chen L, Li M, Zhang S, et al. Comprehensive analysis of NAC  
766 transcription factors uncovers their roles during fiber development and stress response in  
767 cotton. BMC Plant Biology. 2018;18(1):150.  
768
- 769 32. Jin J, Tian F, Yang D-C, Meng Y-Q, Kong L, Luo J, et al. PlantTFDB 4.0: toward a  
770 central hub for transcription factors and regulatory interactions in plants. Nucleic Acids  
771 Research. 2017;45(D1):D1040-D5.  
772
- 773 33. Potter SC, Luciani A, Eddy SR, Park Y, Lopez R, Finn RD. HMMER web server:  
774 2018 update. Nucleic Acids Research. 2018;46(W1):W200-W4.  
775
- 776 34. Ooka H, Satoh K, Doi K, Nagata T, Otomo Y, Murakami K, et al. Comprehensive  
777 analysis of NAC family genes in *Oryza sativa* and *Arabidopsis thaliana*. DNA Research  
778 2003;10:239-47.  
779

- 780 35. Zhang Y, Wang L. The WRKY transcription factor superfamily: its origin in  
781 eukaryotes and expansion in plants. *BMC evolutionary biology*. 2005;5:1.  
782
- 783 36. Wilkins O, Nahal H, Foong J, Provart NJ, Campbell MM. Expansion and  
784 diversification of the *Populus* R2R3-MYB family of transcription factors. *Plant physiology*.  
785 2009;149(2):981-93.  
786
- 787 37. Li X, Duan X, Jiang H, Sun Y, Tang Y, Yuan Z, et al. Genome-wide analysis of  
788 basic/helix-loop-helix transcription factor family in rice and *Arabidopsis*. *Plant physiology*.  
789 2006;141(4):1167-84.  
790
- 791 38. Lijavetzky D, Carbonero P, Vicente-Carbajosa J. Genome-wide comparative  
792 phylogenetic analysis of the rice and *Arabidopsis* Dof gene families. *BMC evolutionary*  
793 *biology*. 2003;3:17.  
794
- 795 39. Wang D, Guo Y, Wu C, Yang G, Li Y, Zheng C. Genome-wide analysis of CCCH  
796 zinc finger family in *Arabidopsis* and rice. *BMC Genomics*. 2008;9(1):44.  
797
- 798 40. Hibara K, Karim MR, Takada S, Taoka K, Furutani M, Aida M, et al. *Arabidopsis*  
799 CUP-SHAPED COTYLEDON3 regulates postembryonic shoot meristem and organ  
800 boundary formation. *Plant Cell*. 2006;18(11):2946-57.  
801
- 802 41. Vroemen CW, Mordhorst AP, Albrecht C, Kwaaitaal MACJ, de Vries SC. The CUP-  
803 SHAPED COTYLEDON3 Gene Is Required for Boundary and Shoot Meristem Formation  
804 in *Arabidopsis*. *The Plant Cell*. 2003;15(7):1563-77.  
805
- 806 42. Zhou J, Zhong R, Ye ZH. *Arabidopsis* NAC domain proteins, VND1 to VND5, are  
807 transcriptional regulators of secondary wall biosynthesis in vessels. *PLoS One*.  
808 2014;9(8):e105726.  
809
- 810 43. Willemsen V, Bauch M, Bennett T, Campilho A, Wolkenfelt H, Xu J, et al. The NAC  
811 domain transcription factors FEZ and SOMBRERO control the orientation of cell division  
812 plane in *Arabidopsis* root stem cells. *Developmental cell*. 2008;15(6):913-22.  
813
- 814 44. Tran L-SP, Nakashima K, Sakuma Y, Simpson SD, Fujita Y, Maruyama K, et al.  
815 Isolation and Functional Analysis of *Arabidopsis* Stress-Inducible NAC Transcription  
816 Factors That Bind to a Drought-Responsive cis-Element in the early responsive to  
817 dehydration stress 1 Promoter. *The Plant Cell*. 2004;16(9):2481-98.  
818
- 819 45. Zhao J, Liu JS, Meng FN, Zhang ZZ, Long H, Lin WH, et al. ANAC005 is a  
820 membrane-associated transcription factor and regulates vascular development in  
821 *Arabidopsis*. *Journal of integrative plant biology*. 2016;58(5):442-51.  
822
- 823 46. Kim YS, Park CM. Membrane regulation of cytokinin-mediated cell division in  
824 *Arabidopsis*. *Plant signaling & behavior*. 2007;2(1):15-6.  
825

- 826 47. Rahman H, Ramanathan V, Nallathambi J, Duraialagaraja S, Muthurajan R. Over-  
827 expression of a NAC 67 transcription factor from finger millet (*Eleusine coracana L.*)  
828 confers tolerance against salinity and drought stress in rice. BMC biotechnology. 2016;16  
829 Suppl 1:35.  
830
- 831 48. Jung JH, Park CM. Auxin modulation of salt stress signaling in Arabidopsis seed  
832 germination. Plant signaling & behavior. 2011;6(8):1198-200.  
833
- 834 49. Prince VE, Pickett FB. Splitting pairs: the diverging fates of duplicated genes.  
835 Nature reviews Genetics. 2002;3(11):827-37.  
836
- 837 50. Liu M, Ma Z, Sun W, Huang L, Wu Q, Tang Z, et al. Genome-wide analysis of the  
838 NAC transcription factor family in Tartary buckwheat (*Fagopyrum tataricum*). BMC  
839 Genomics. 2019;20(1):113.  
840
- 841 51. Shahnejat-Bushehri S, Tarkowska D, Sakuraba Y, Balazadeh S. Arabidopsis NAC  
842 transcription factor JUB1 regulates GA/BR metabolism and signalling. Nature plants.  
843 2016;2.  
844
- 845 52. Thirumalaikumar VP, Devkar V, Mehterov N, Ali S, Ozgur R, Turkan I, et al. NAC  
846 transcription factor JUNGBRUNNEN1 enhances drought tolerance in tomato. Plant  
847 Biotechnology Journal. 2018;16(2):354-66.  
848
- 849 53. Lee S, Lee HJ, Huh SU, Paek KH, Ha JH, Park CM. The Arabidopsis NAC  
850 transcription factor NTL4 participates in a positive feedback loop that induces  
851 programmed cell death under heat stress conditions. Plant science : an international  
852 journal of experimental plant biology. 2014;227:76-83.  
853
- 854 54. He XJ, Mu RL, Cao WH, Zhang ZG, Zhang JS, Chen SY. AtNAC2, a transcription  
855 factor downstream of ethylene and auxin signaling pathways, is involved in salt stress  
856 response and lateral root development. The Plant journal : for cell and molecular biology.  
857 2005;44(6):903-16.  
858
- 859 55. De Zelicourt A, Diet A, Marion J, Laffont C, Ariel F, Moison M, et al. Dual  
860 involvement of a *Medicago truncatula* NAC transcription factor in root abiotic stress  
861 response and symbiotic nodule senescence. The Plant journal : for cell and molecular  
862 biology. 2012;70(2):220-30.  
863
- 864 56. Zhong R, Ye Z-H. The Arabidopsis NAC transcription factor NST2 functions  
865 together with SND1 and NST1 to regulate secondary wall biosynthesis in fibers of  
866 inflorescence stems. Plant signaling & behavior. 2015;10(2):e989746-e.  
867
- 868 57. Nuruzzaman M, Sharoni AM, Kikuchi S. Roles of NAC transcription factors in the  
869 regulation of biotic and abiotic stress responses in plants. Frontiers in Microbiology.  
870 2013;4:248.  
871



- 872 58. Golldack D, Lüking I, Yang O. Plant tolerance to drought and salinity: stress  
873 regulating transcription factors and their functional significance in the cellular  
874 transcriptional network. *Plant cell reports*. 2011;30(8):1383-91.  
875
- 876 59. Chen X, Wang Y, Lv B, Li J, Luo L, Lu S, et al. The NAC family transcription factor  
877 OsNAP confers abiotic stress response through the ABA pathway. *Plant & cell*  
878 *physiology*. 2014;55(3):604-19.  
879
- 880 60. Huang Q, Wang Y, Li B, Chang J, Chen M, Li K, et al. TaNAC29, a NAC  
881 transcription factor from wheat, enhances salt and drought tolerance in transgenic  
882 *Arabidopsis*. *BMC Plant Biol*. 2015;15:268.  
883
- 884 61. Yang SD, Seo PJ, Yoon HK, Park CM. The *Arabidopsis* NAC transcription factor  
885 VNI2 integrates abscisic acid signals into leaf senescence via the COR/RD genes. *The*  
886 *Plant cell*. 2011;23(6):2155-68.  
887
- 888 62. Seok HY, Woo DH, Nguyen LV, Tran HT, Tarte VN, Mehdi SM, et al. *Arabidopsis*  
889 *AtNAP* functions as a negative regulator via repression of *AREB1* in salt stress response.  
890 *Planta*. 2017;245(2):329-41.  
891
- 892 63. Tran LS, Nakashima K, Sakuma Y, Simpson SD, Fujita Y, Maruyama K, et al.  
893 Isolation and functional analysis of *Arabidopsis* stress-inducible NAC transcription factors  
894 that bind to a drought-responsive cis-element in the early responsive to dehydration  
895 stress 1 promoter. *Plant Cell*. 2004;16(9):2481-98.  
896
- 897 64. Delessert C, Kazan K, Wilson IW, Van Der Straeten D, Manners J, Dennis ES, et  
898 al. The transcription factor *ATAF2* represses the expression of pathogenesis-related  
899 genes in *Arabidopsis*. *The Plant journal : for cell and molecular biology*. 2005;43(5):745-  
900 57.  
901
- 902 65. Seki M, Narusaka M, Ishida J, Nanjo T, Fujita M, Oono Y, et al. Monitoring the  
903 expression profiles of 7000 *Arabidopsis* genes under drought, cold and high-salinity  
904 stresses using a full-length cDNA microarray. *The Plant journal : for cell and molecular*  
905 *biology*. 2002;31(3):279-92.  
906
- 907 66. Wu Y, Deng Z, Lai J, Zhang Y, Yang C, Yin B, et al. Dual function of *Arabidopsis*  
908 *ATAF1* in abiotic and biotic stress responses. *Cell research*. 2009;19(11):1279-90.  
909
- 910 67. Shahnejat-Bushehri S, Mueller-Roeber B, Balazadeh S. *Arabidopsis* NAC  
911 transcription factor *JUNGBRUNNEN1* affects thermomemory-associated genes and  
912 enhances heat stress tolerance in primed and unprimed conditions. *Plant Signaling &*  
913 *Behavior*. 2012;7(12):1518-21.  
914
- 915 68. Guan Q, Yue X, Zeng H, Zhu J. The protein phosphatase *RCF2* and its interacting  
916 partner *NAC019* are critical for heat stress-responsive gene regulation and  
917 thermotolerance in *Arabidopsis*. *Plant Cell*. 2014;26(1):438-53.



- 918  
919 69. Fang Y, Liao K, Du H, Xu Y, Song H, Li X, et al. A stress-responsive NAC  
920 transcription factor SNAC3 confers heat and drought tolerance through modulation of  
921 reactive oxygen species in rice. *Journal of experimental botany*. 2015;66(21):6803-17.  
922  
923 70. Guo W, Zhang J, Zhang N, Xin M, Peng H, Hu Z, et al. The Wheat NAC  
924 Transcription Factor TaNAC2L Is Regulated at the Transcriptional and Post-Translational  
925 Levels and Promotes Heat Stress Tolerance in Transgenic Arabidopsis. *PLoS One*.  
926 2015;10(8):e0135667.  
927  
928 71. Morcuende R, Bari R, Gibon Y, Zheng W, Pant BD, Blasing O, et al. Genome-wide  
929 reprogramming of metabolism and regulatory networks of Arabidopsis in response to  
930 phosphorus. *Plant, cell & environment*. 2007;30(1):85-112.  
931  
932 72. Misson J, Raghothama KG, Jain A, Jouhet J, Block MA, Bligny R, et al. A genome-  
933 wide transcriptional analysis using *Arabidopsis thaliana* Affymetrix gene chips determined  
934 plant responses to phosphate deprivation. *Proceedings of the National Academy of  
935 Sciences of the United States of America*. 2005;102(33):11934-9.  
936  
937 73. Nilsson L, Müller R, Nielsen TH. Dissecting the plant transcriptome and the  
938 regulatory responses to phosphate deprivation. *Physiologia Plantarum*. 2010;139(2):129-  
939 43.  
940  
941 74. Krogh A, Larsson B, von Heijne G, Sonnhammer EL. Predicting transmembrane  
942 protein topology with a hidden Markov model: application to complete genomes. *Journal  
943 of molecular biology*. 2001;305(3):567-80.  
944  
945 75. Edgar RC. MUSCLE: multiple sequence alignment with high accuracy and high  
946 throughput. *Nucleic Acids Research*. 2004;32(5):1792-7.  
947  
948 76. Kumar S, Stecher G, Tamura K. MEGA7: Molecular Evolutionary Genetics  
949 Analysis Version 7.0 for Bigger Datasets. *Molecular biology and evolution*.  
950 2016;33(7):1870-4.  
951  
952 77. Hu B, Jin J, Guo A-Y, Zhang H, Luo J, Gao G. GSDS 2.0: an upgraded gene  
953 feature visualization server. *Bioinformatics*. 2015;31(8):1296-7.  
954  
955 78. Kamranfar I, Xue G-P, Tohge T, Sedaghatmehr M, Fernie AR, Balazadeh S, et al.  
956 Transcription factor RD26 is a key regulator of metabolic reprogramming during dark-  
957 induced senescence. *New Phytologist*. 2018;218(4):1543-57.

958

959

## 960 **Supporting Information:**

### 961 **S1 Fig. Bar graph showing the number of genes in each transcription factor family** 962 **in Arabidopsis and quinoa.**

963 Data generated using the plant transcription factor prediction tool in the plant transcription  
964 factor database (PTFDB, <http://planttfdb.cbi.pku.edu.cn/>, version 4.0) (32).

965

### 966 **S2 Fig. Distribution of NAC genes along the genome.**

967 a) CqNAC distribution across sub-genome A and sub-genome B. b) Number of CqNAC  
968 genes per chromosome.

969

### 970 **S2 Fig. Comparison of RNAseq with qRT-PCR results.**

971 Relative expression of CqNACs after treatment relative to control. a) Expression after salt  
972 treatment. b) Expression after drought treatment. c) Expression after heat treatment.

973

### 974 **S1 Table. TFs in quinoa predicted by PTFDB.**

975 List of all predicted transcription factors belonging to different families in the genome of  
976 quinoa as predicted by the plant transcription factor prediction tool in the plant  
977 transcription factor database (PTFDB) (32).

978

### 979 **S2 Table. Predicted NACs in quinoa.**

980 List of predicted NACs obtained from the three search tools including BLASTp, Pfam and  
981 PTFDB, and list of CqNACs validated by HHmer and prosite scanning tool.

982

### 983 **S3 Table: List of CqNACs and their homoeologes according to BLASTp and** 984 **synteny analysis.**

985 a) List of CqNACs that has a single homoeolog in same cluster, 52 genes "26 pairs". b)  
986 List of CqNACs that has single homoeolog in different clusters (7 pairs "14genes"). c) List  
987 of CqNACs that has more than one homolog in different cluster, (16 genes). d) List of  
988 CqNACs that has no homolog according our parameters "25 genes".

### 989 **S4 Table: Comparison between phylogenetic subgroups of CqNACs and AtNACs.**

990 a) Number of Arabidopsis and quinoa NAC members in each phylogenetic subgroups. b)  
991 Function of genes in the phylogenetic subgroups 8, 16 and 18 that are absent in quinoa.

### 992 **S5 Table: Cumulative expression from RNAseq data of all of the Quinoa CqNACs** 993 **in all of the treatments.**

994

### 995 **S6 Table: Expression values of duplicated CqNACs in control and stress** 996 **conditions (salt, drought, heat and phosphate starvation).**

997 Expression values are based on RNAseq of three biological replicates. The significance  
998 of gene expression differences was calculated at FDR=0.05.

### 999 **S7 Table: List of primer sequences used in qRT-PCR reaction.**

Fig 1

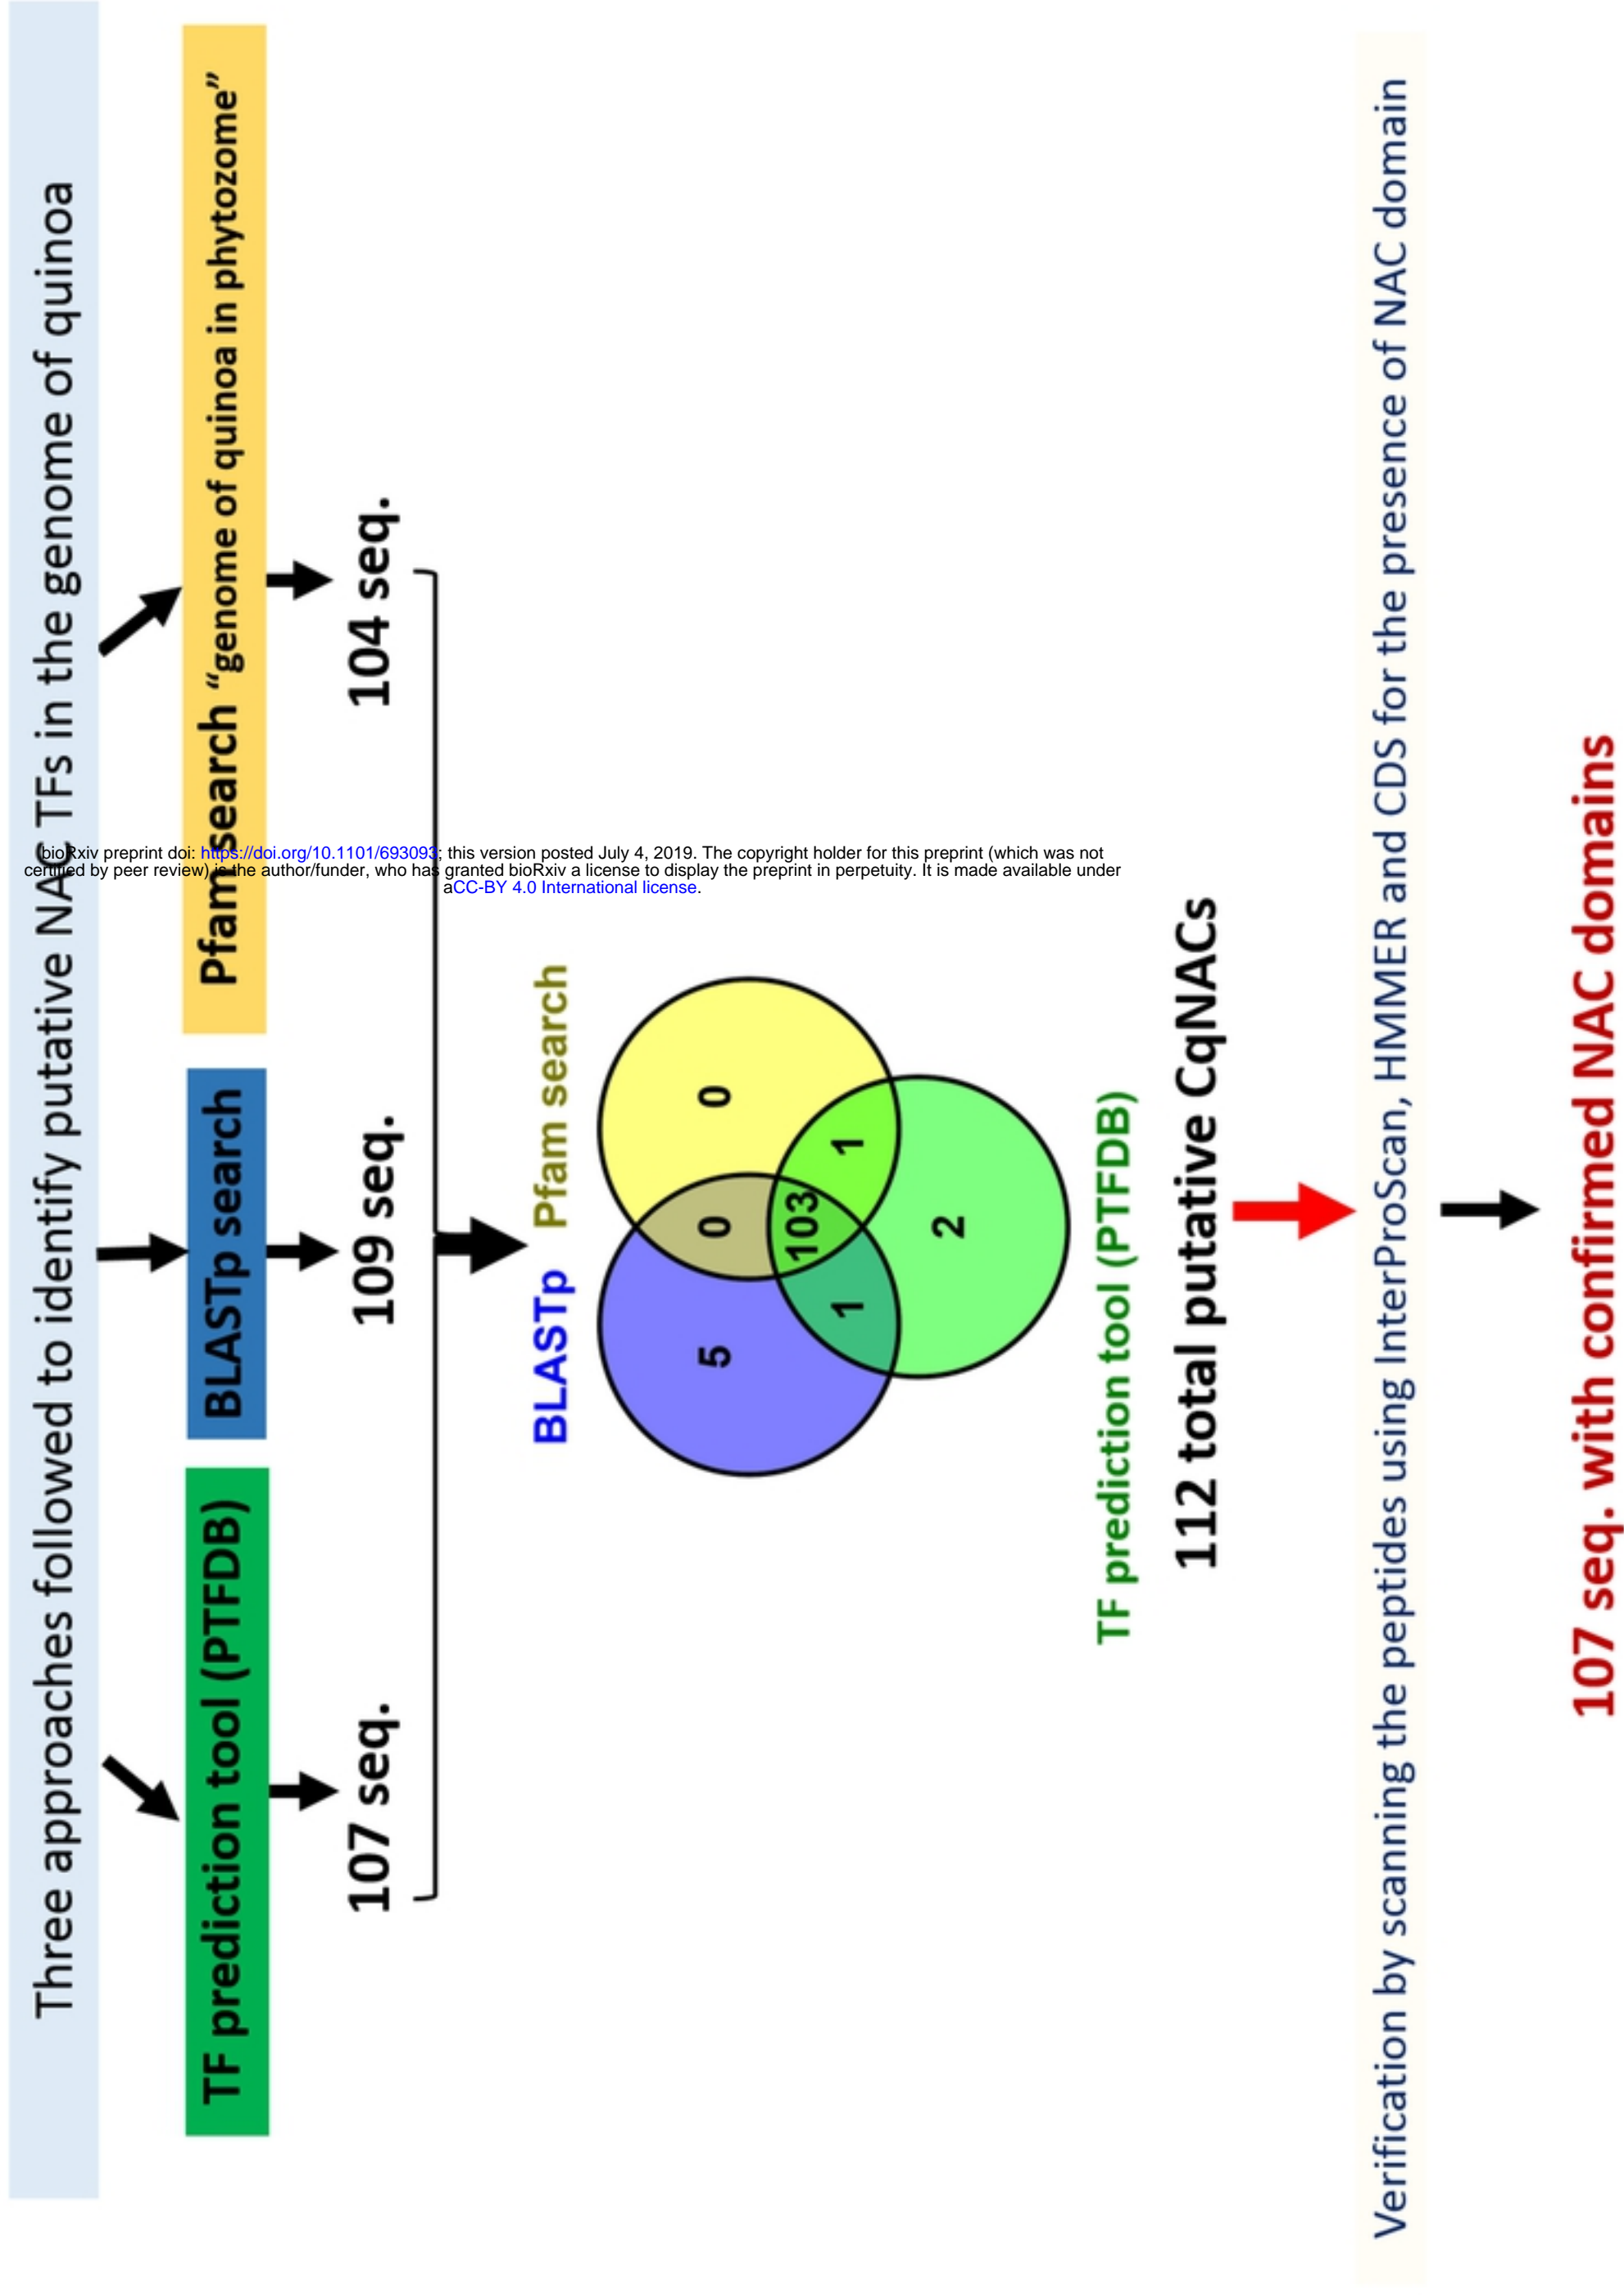

a)

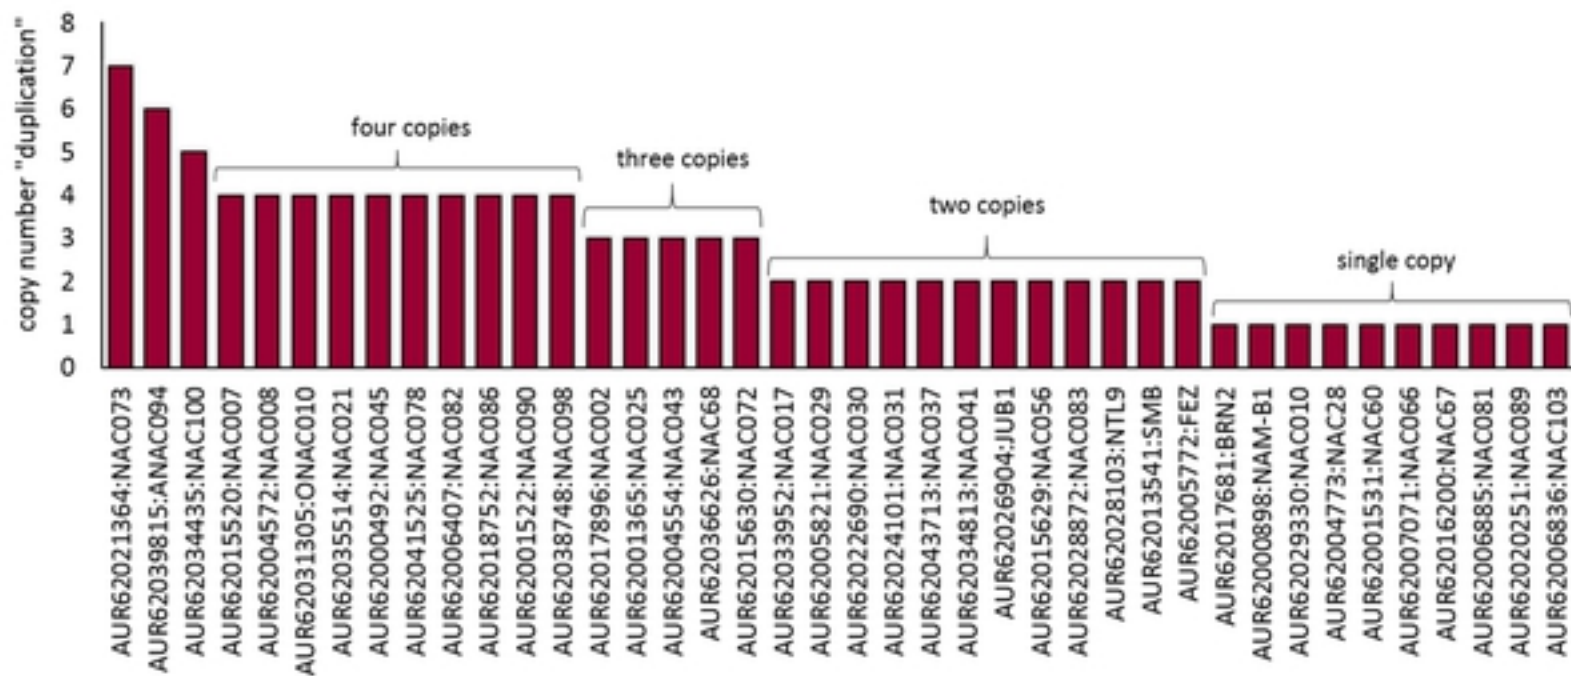

b)

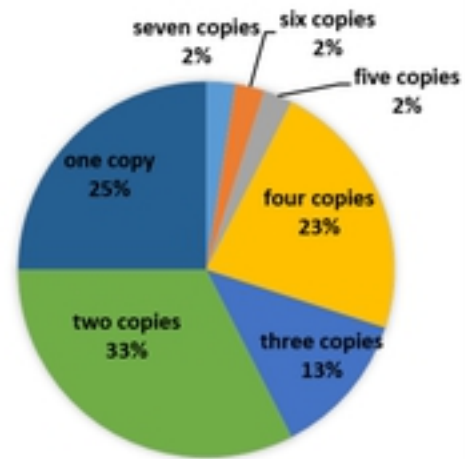

Fig 2





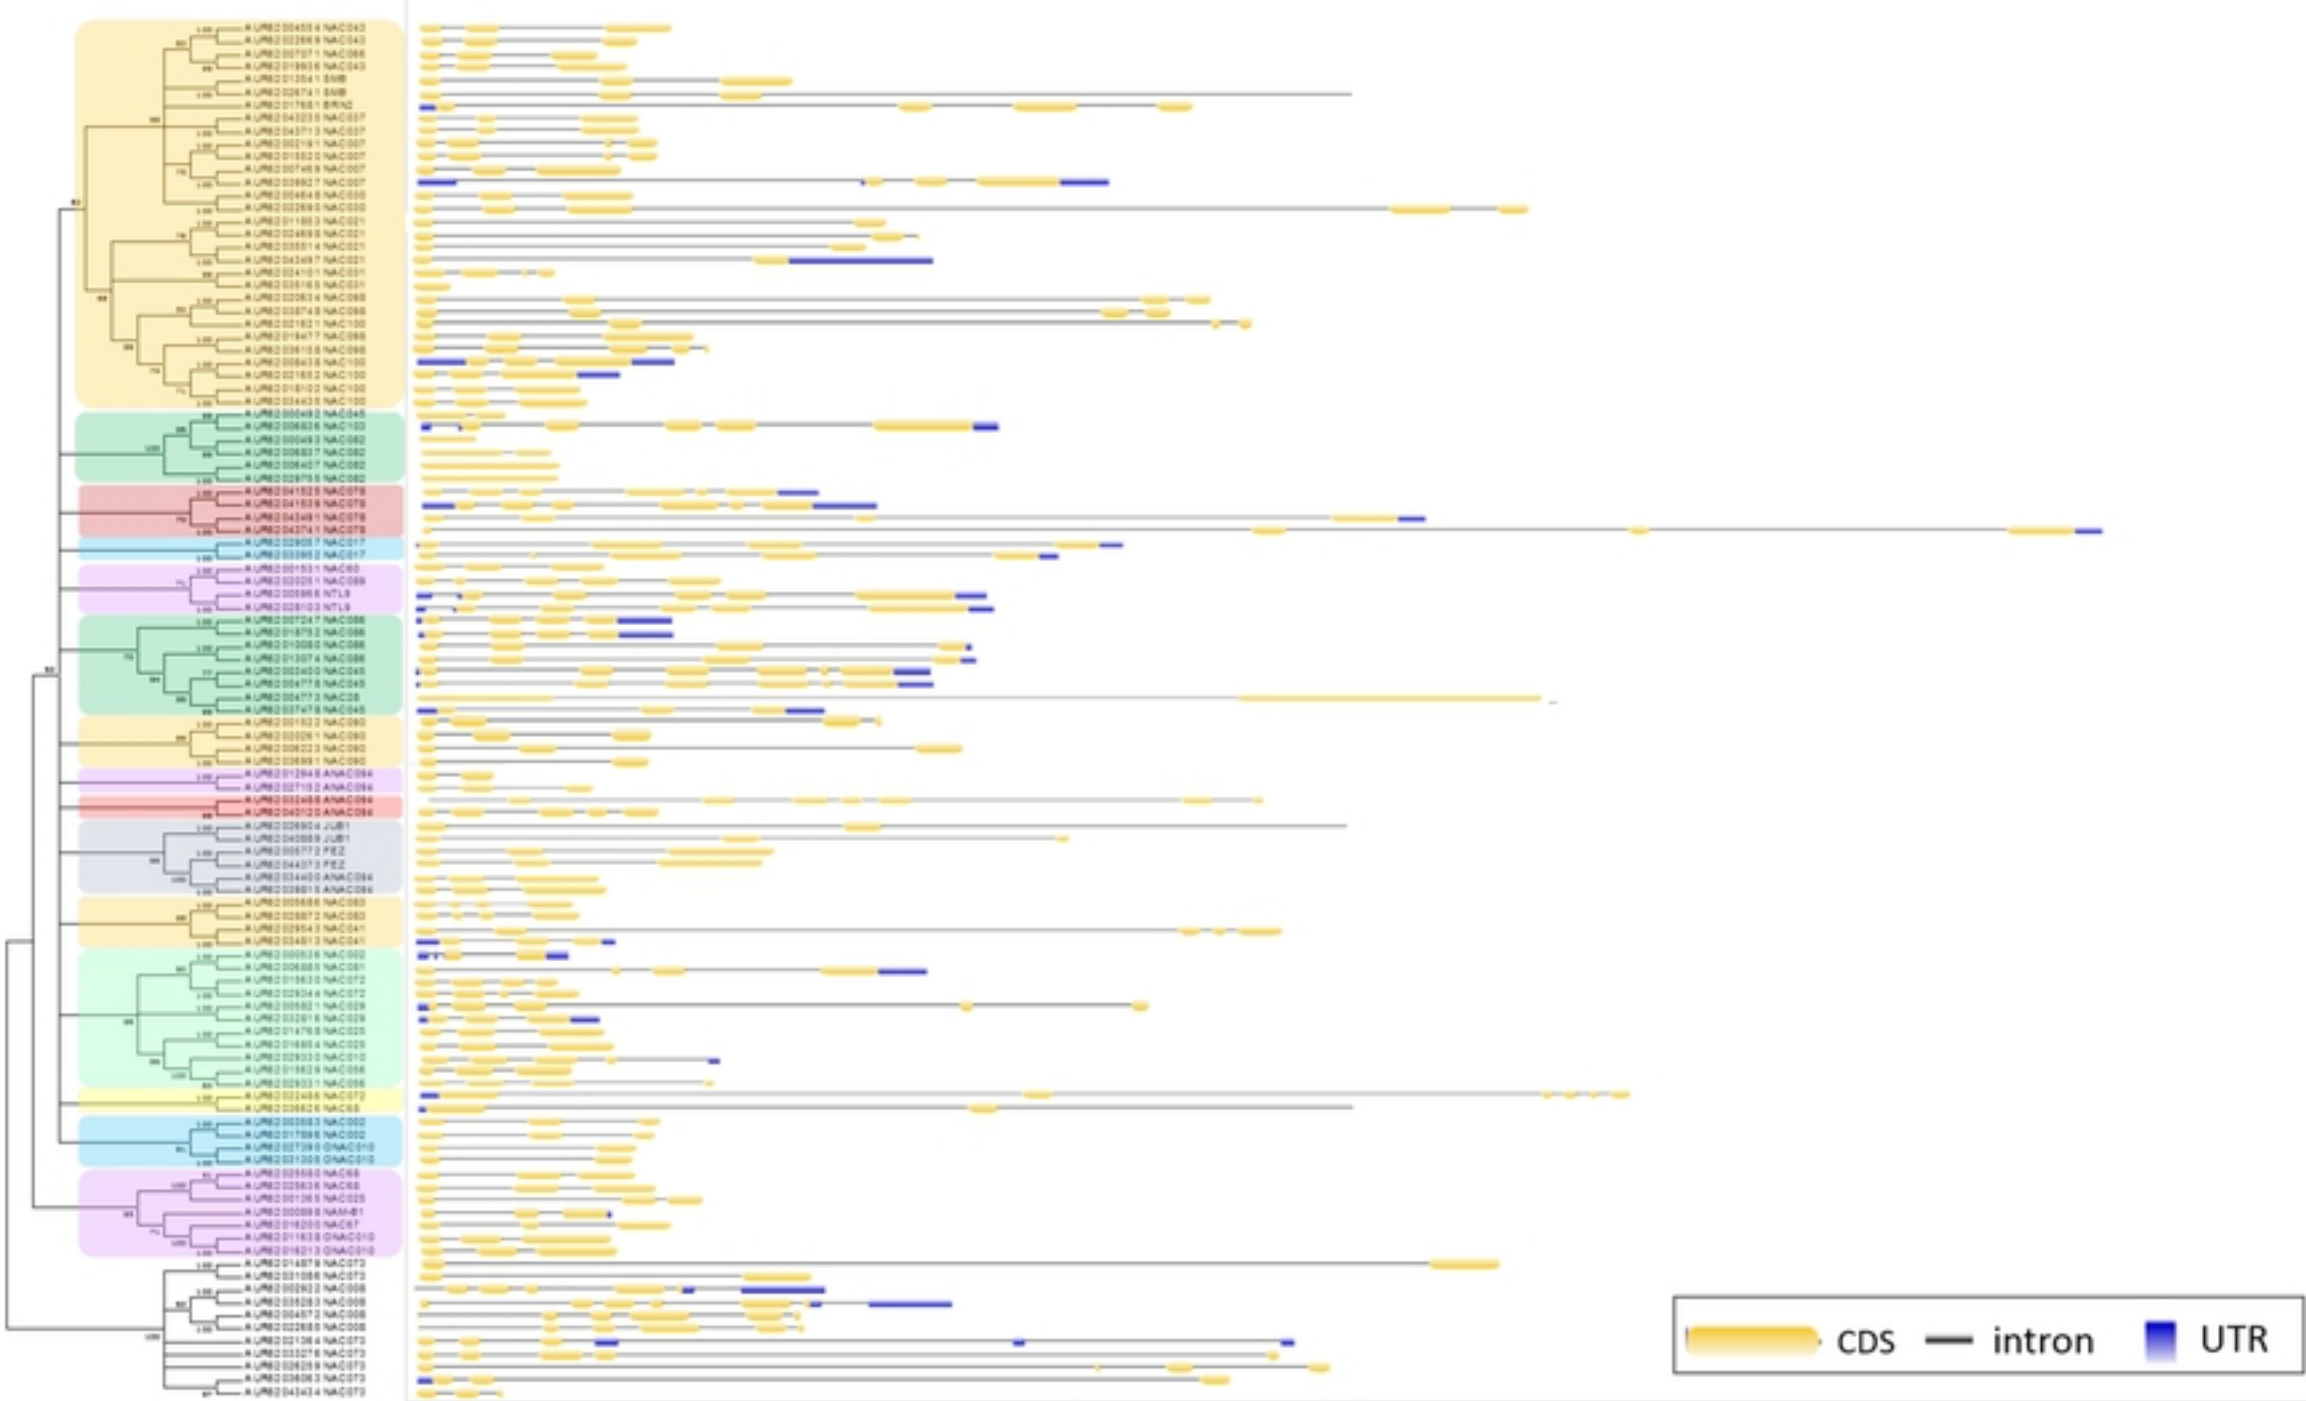

Fig 4



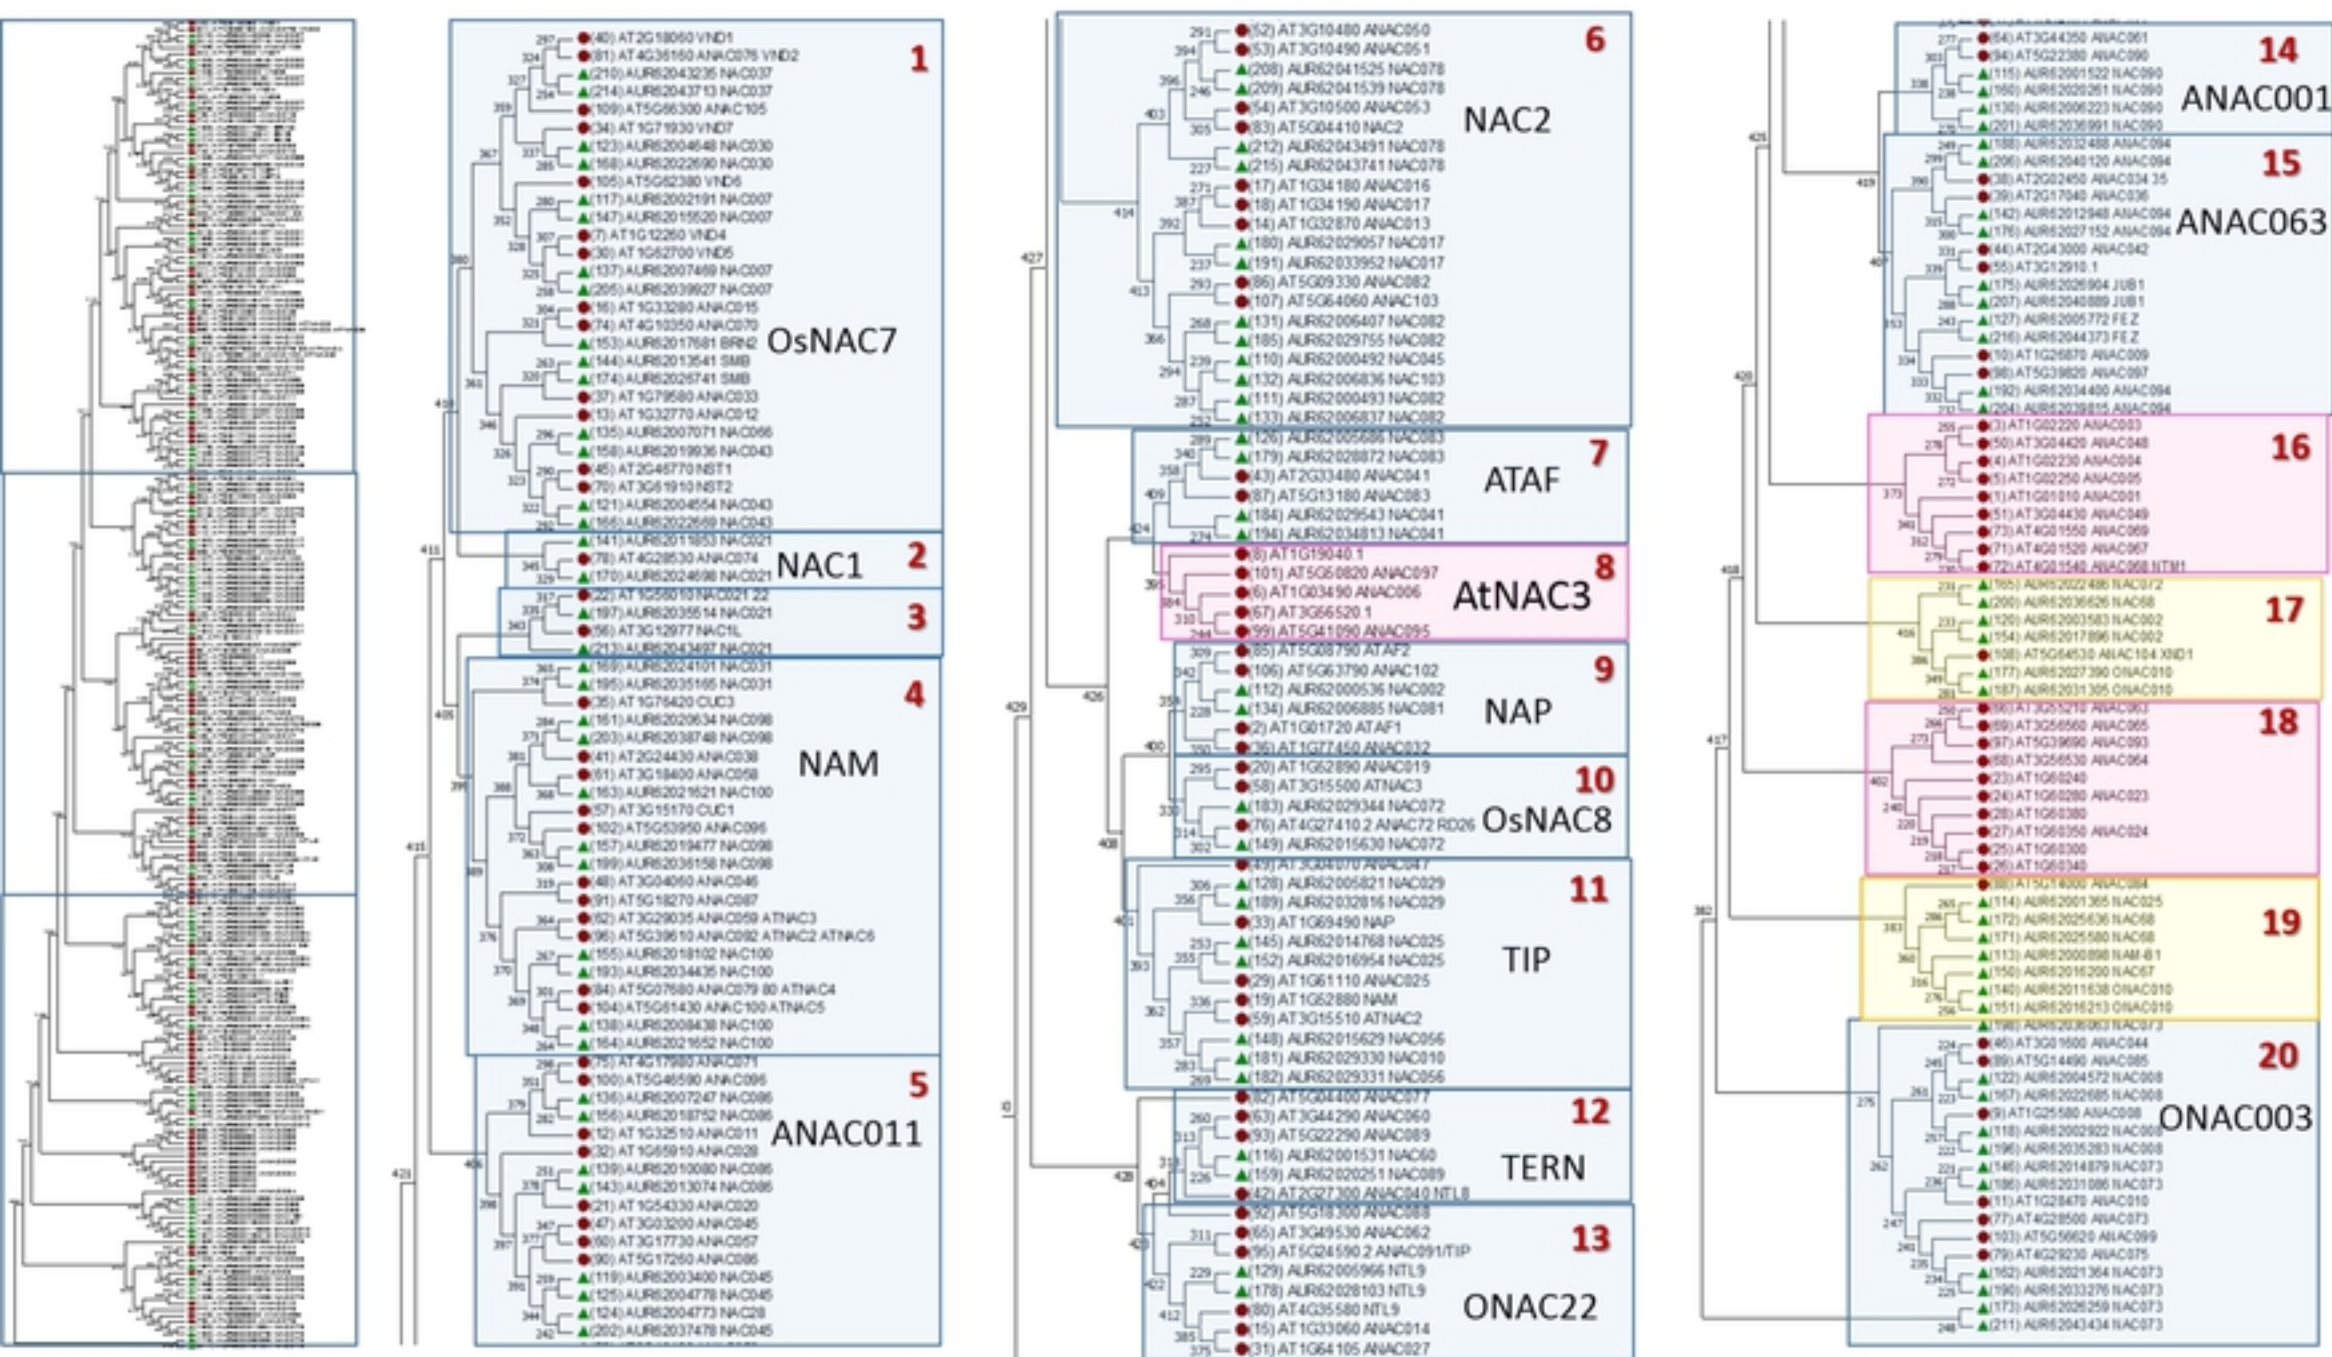

Fig 5

a) Genes two times duplicated:

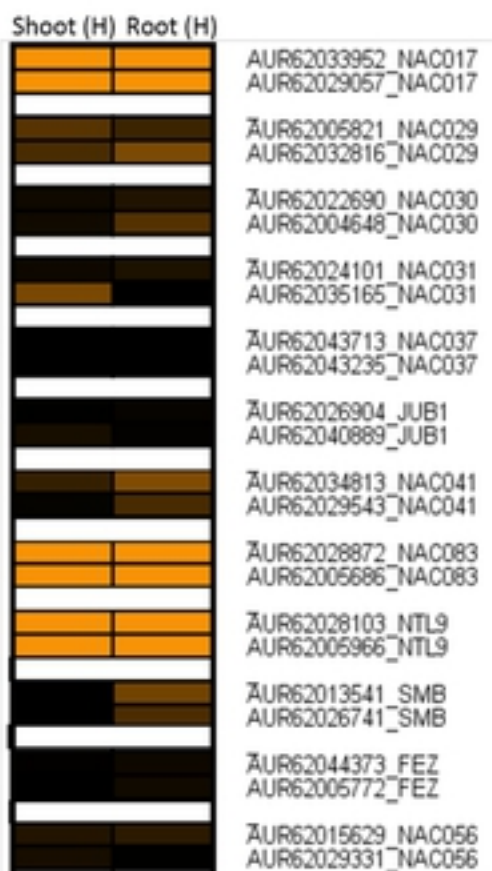

b) Genes three times duplicated:

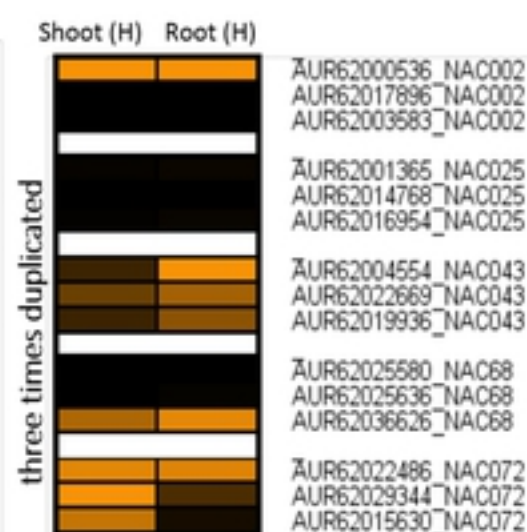

c) Genes four times duplicated:

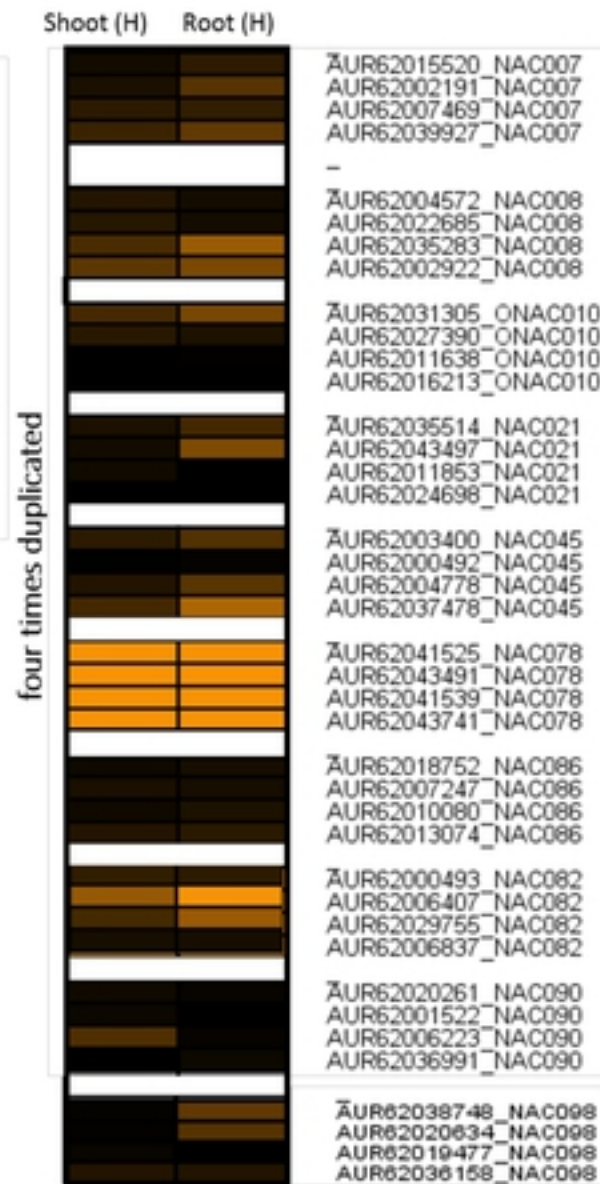

d) Genes more than four times duplicated

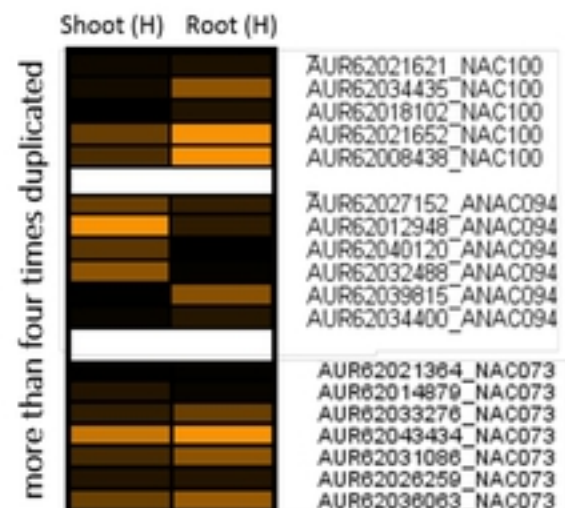

e) Genes that have a single copy

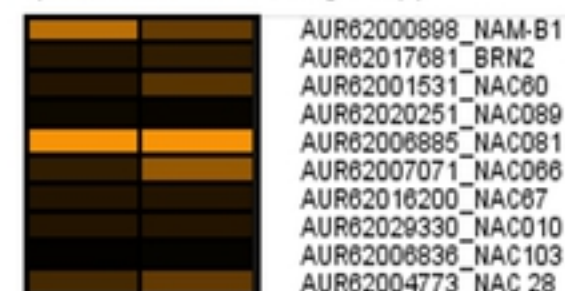

Expression level: FPKM values

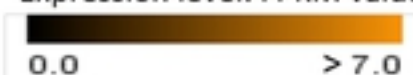

Fig 6



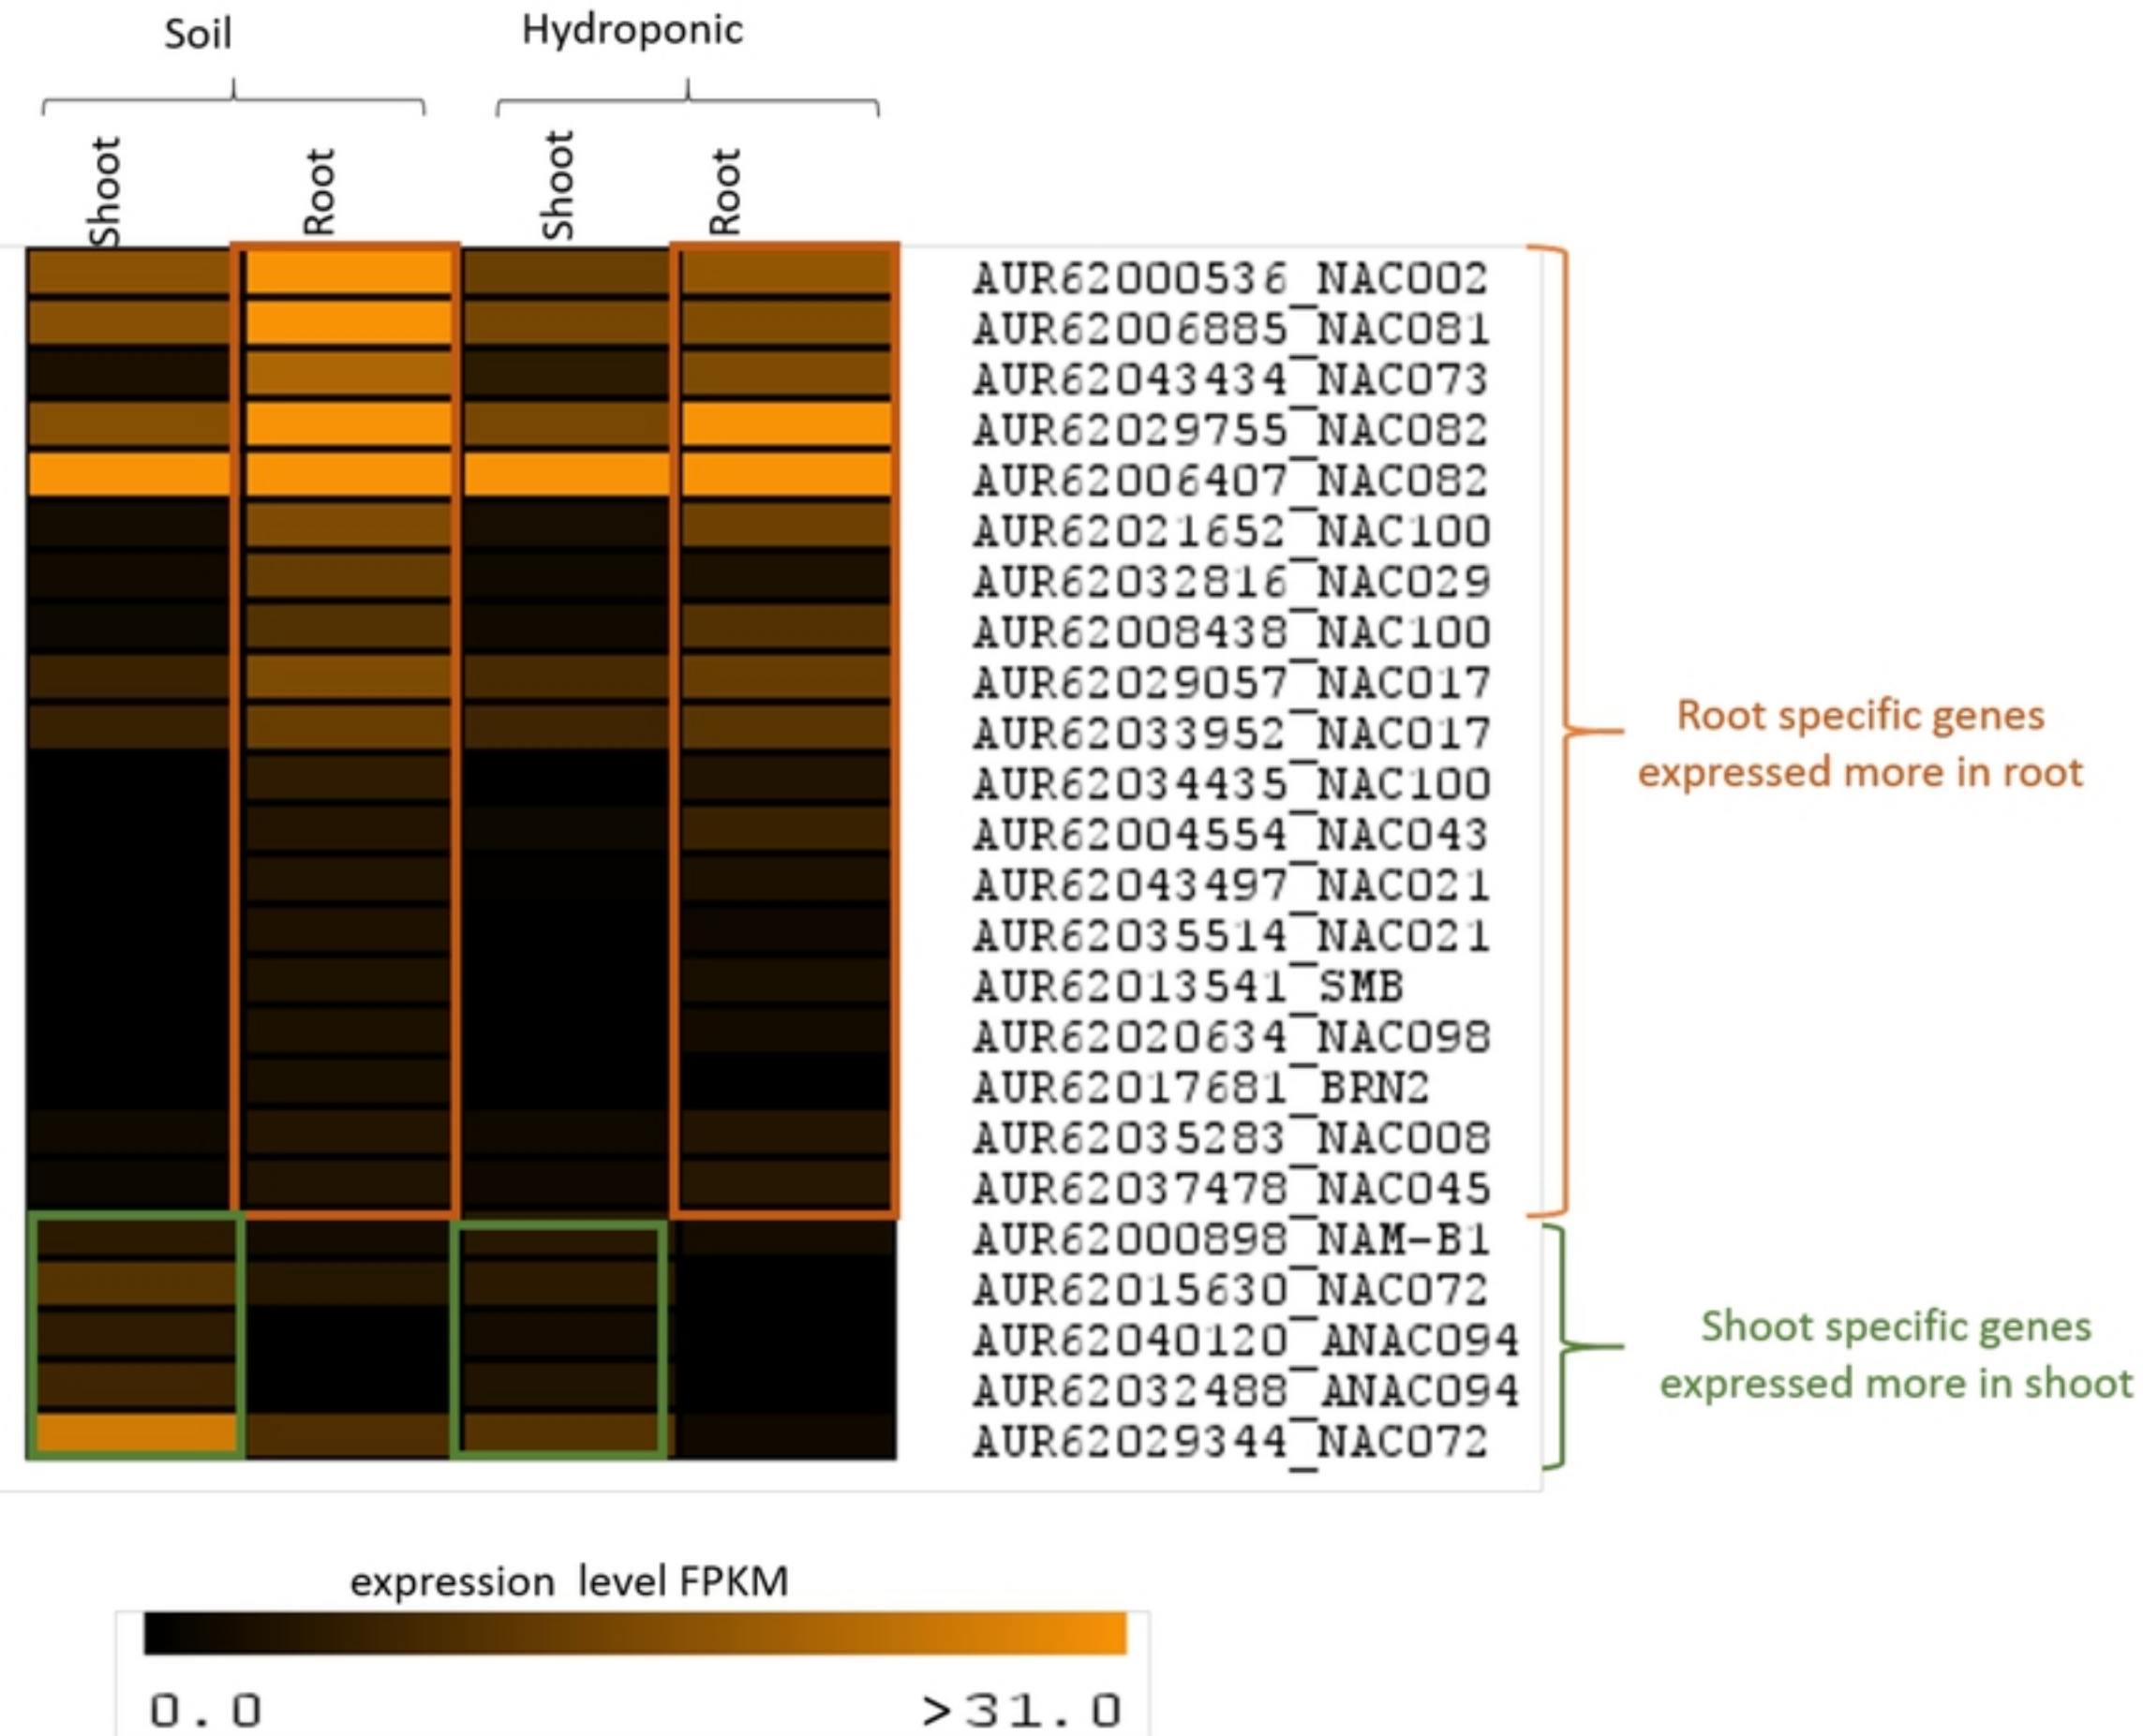

Fig 7

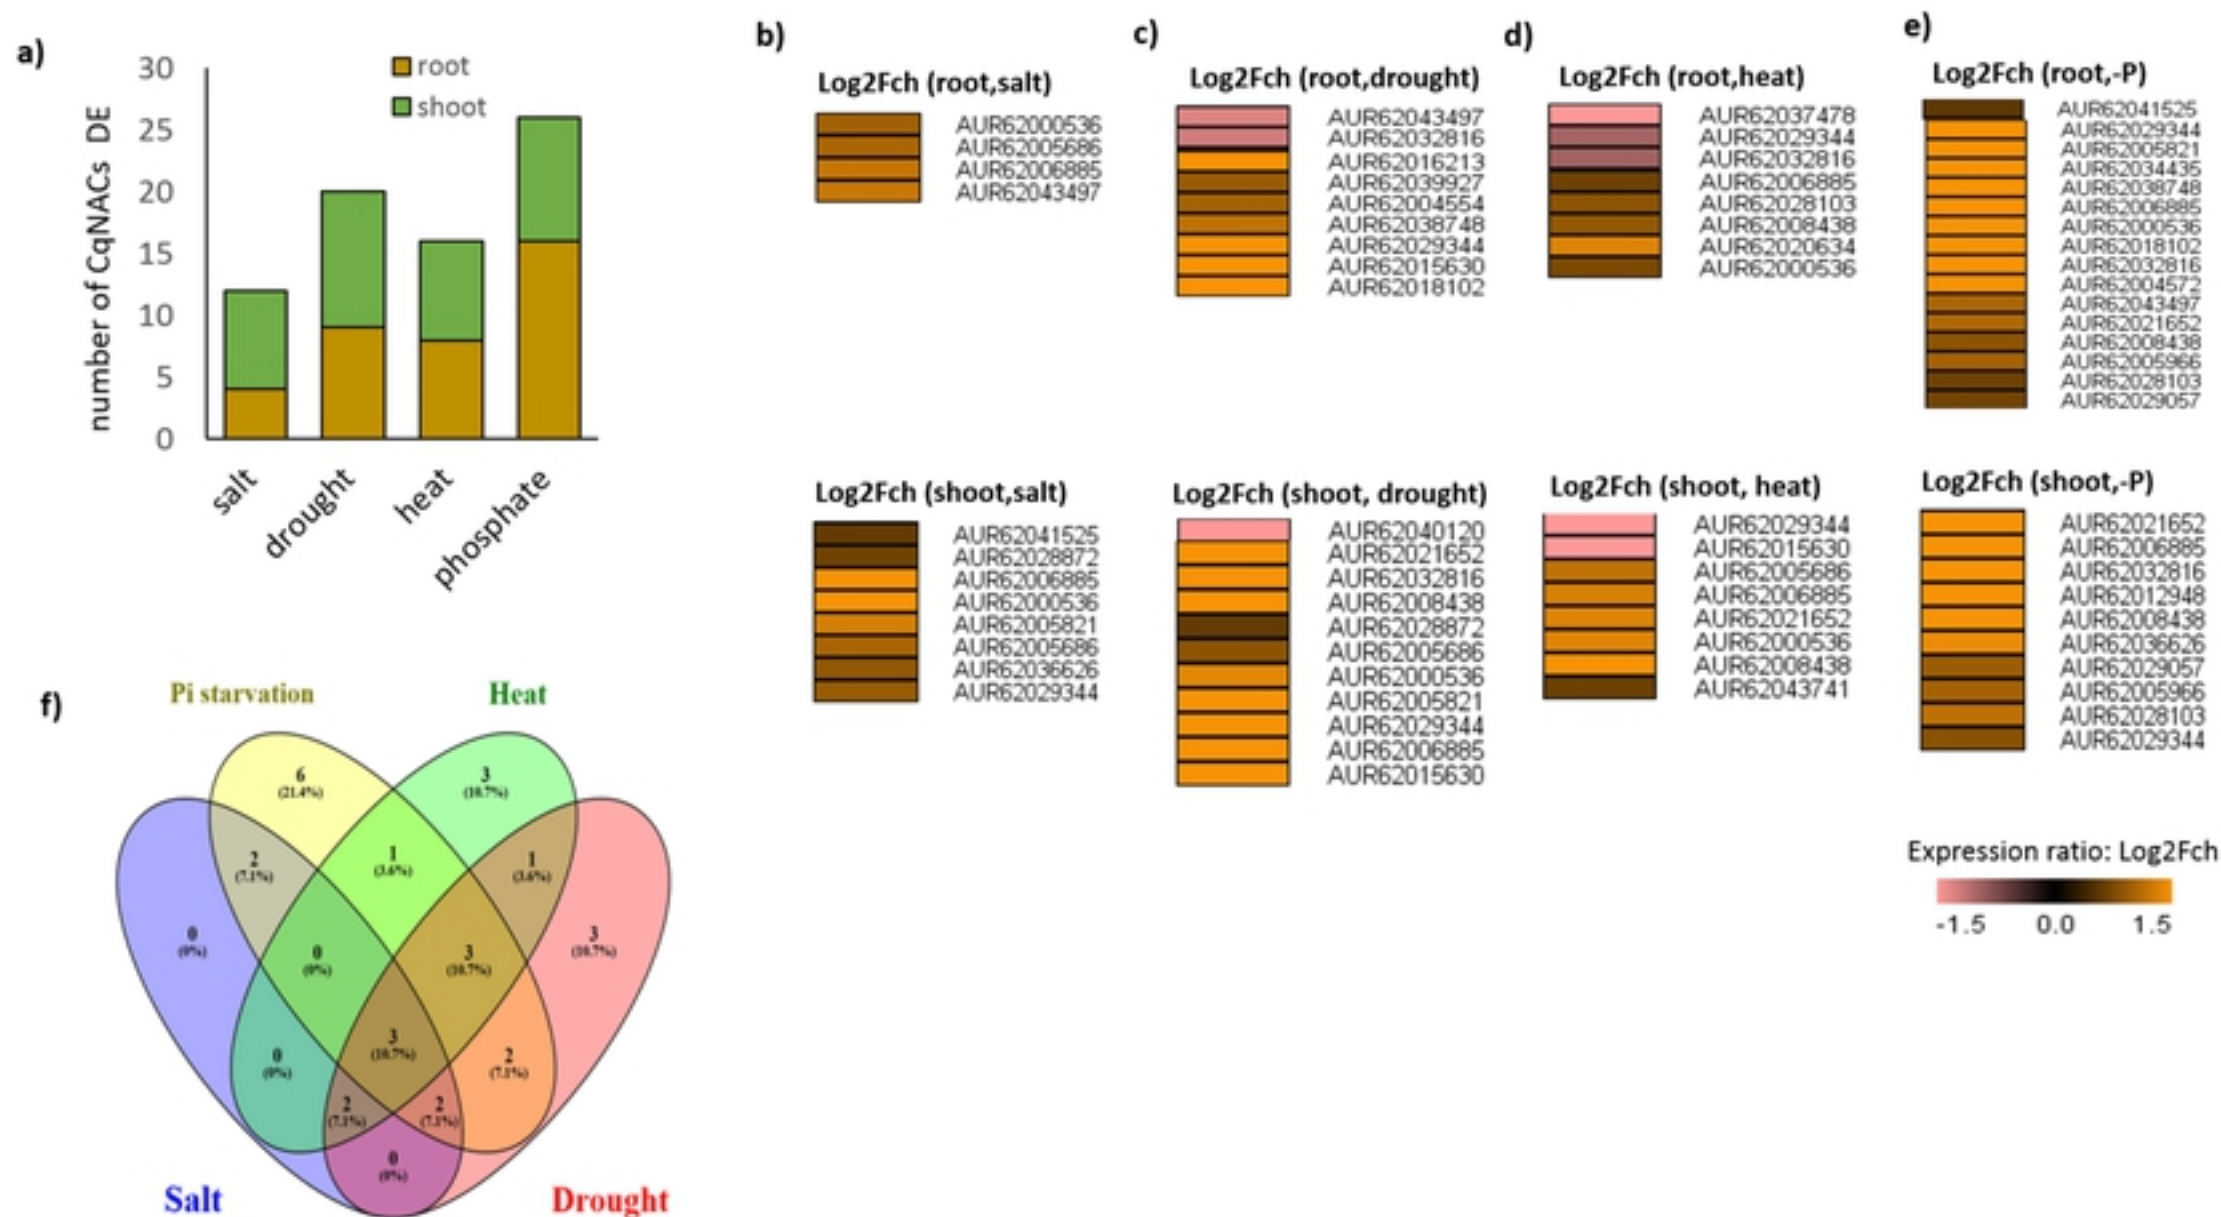

Fig 8

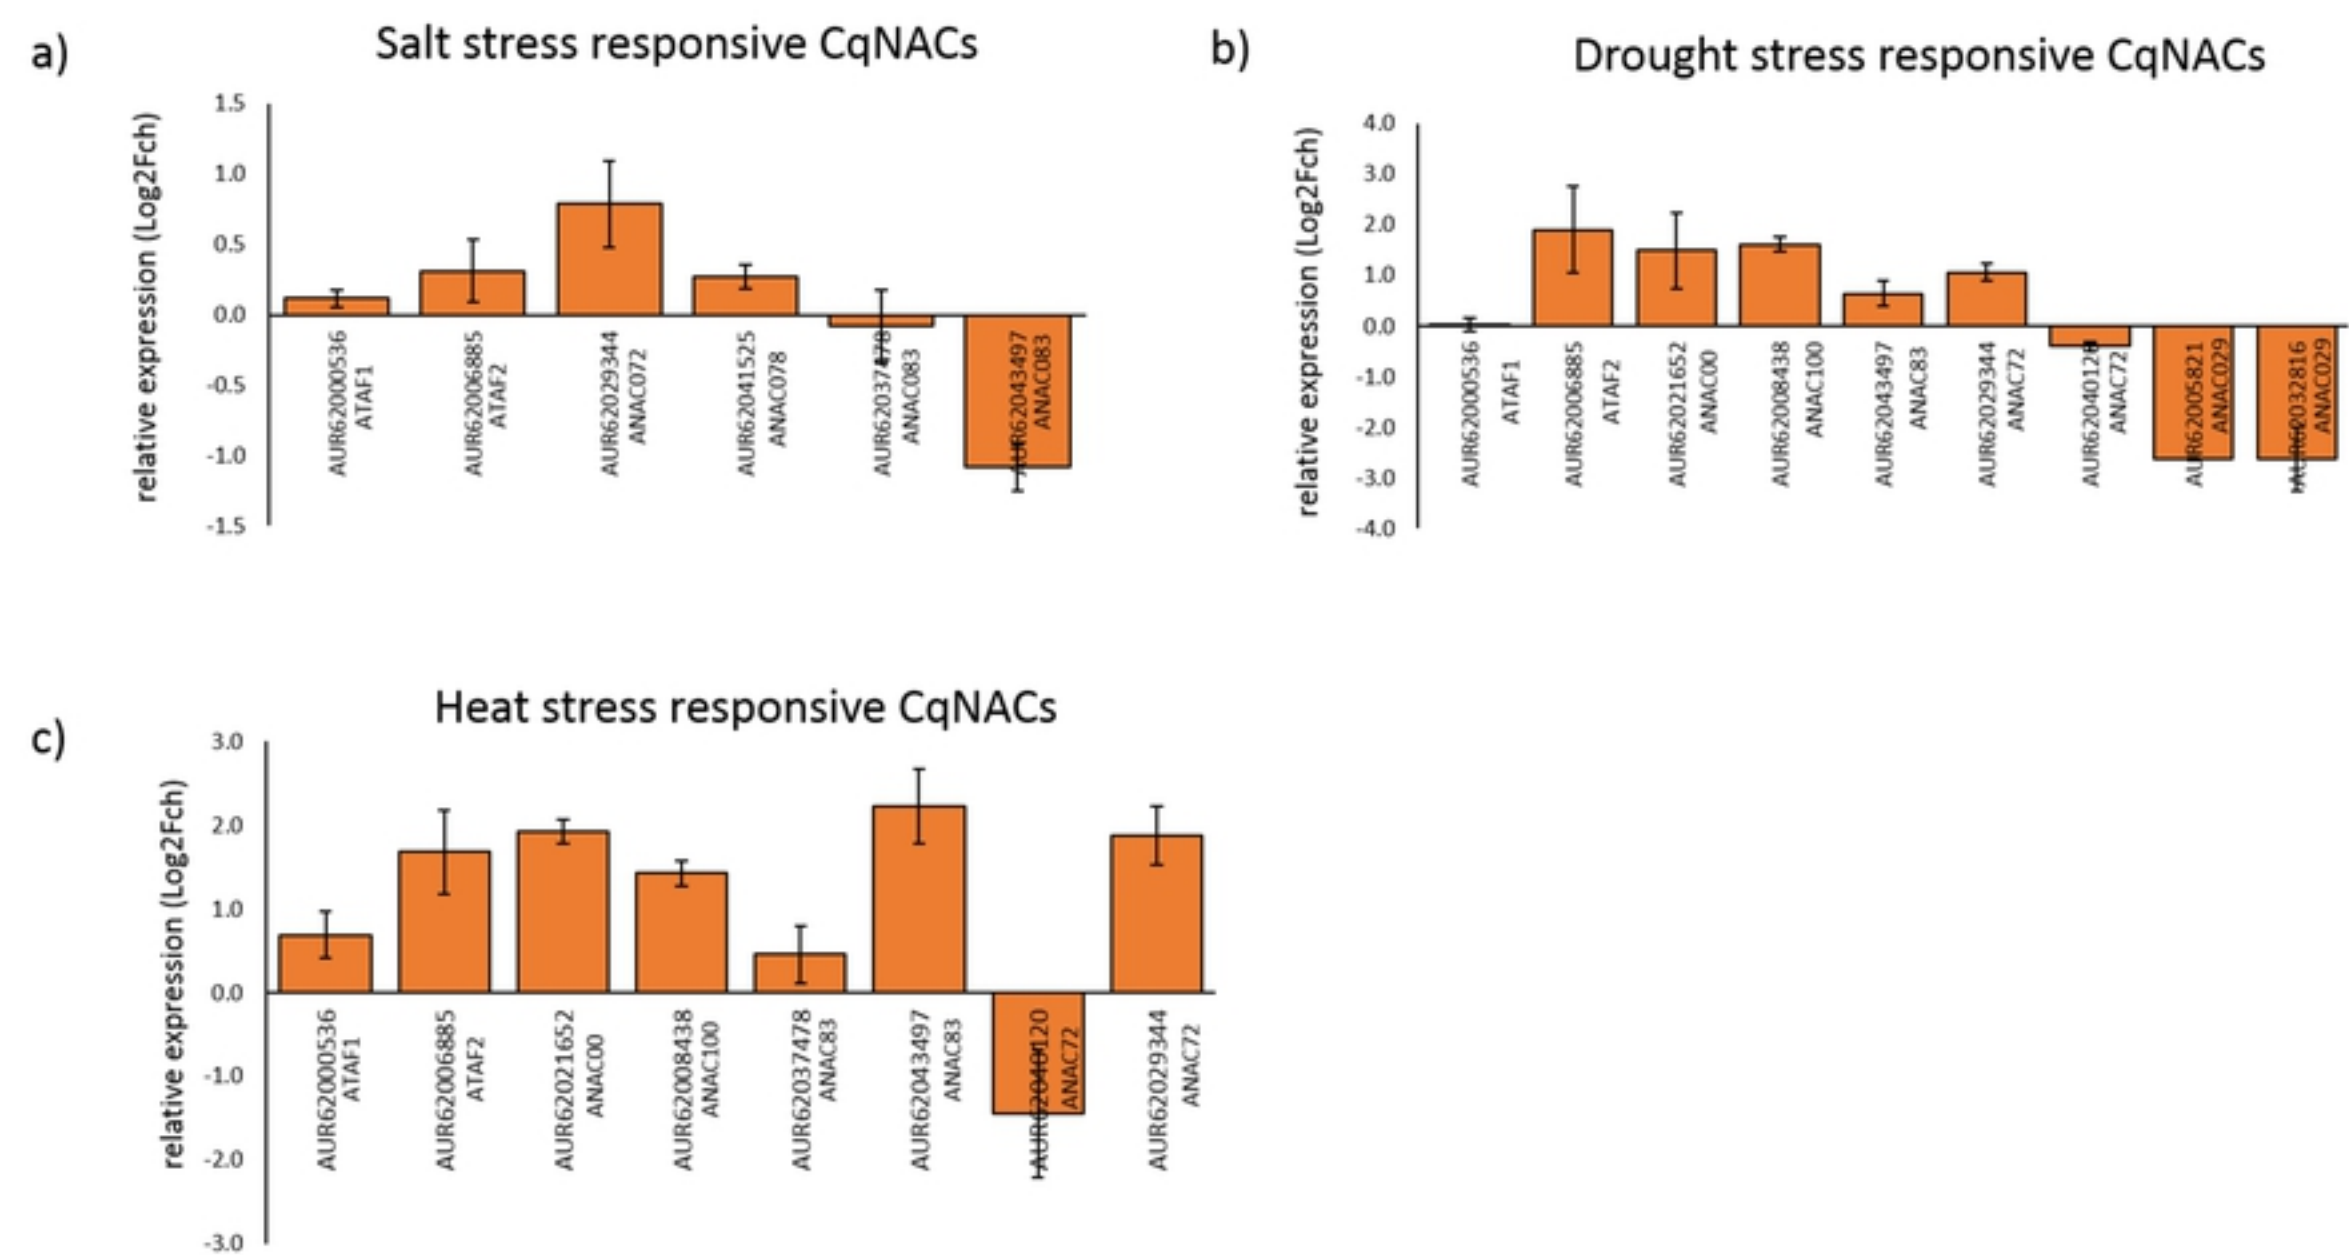

Fig 9
